# Supplementary material for: Betainium-based ionic liquids catalyzed multicomponent Hantzsch reactions for the efficient synthesis of acridinediones
Source: Royal Society of Chemistry journal article supplement (doi:10.1039/c6ra25709g), 2017-01-01

Supporting information

NMR spectra of *Acridinediones Derivatives*

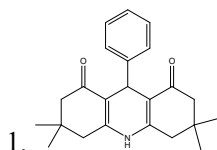

$^1\text{H}$  NMR (400 MHz,  $\text{CDCl}_3$ )  $\delta$  7.32 (d, 2H), 7.19(t, 2H), 7.07 (t, 1H), 6.98 (s, 1H), 5.09 (s, 1H), 2.35-2.13(m, 8H), 1.07 (s, 6H), 0.95 (s, 6H).

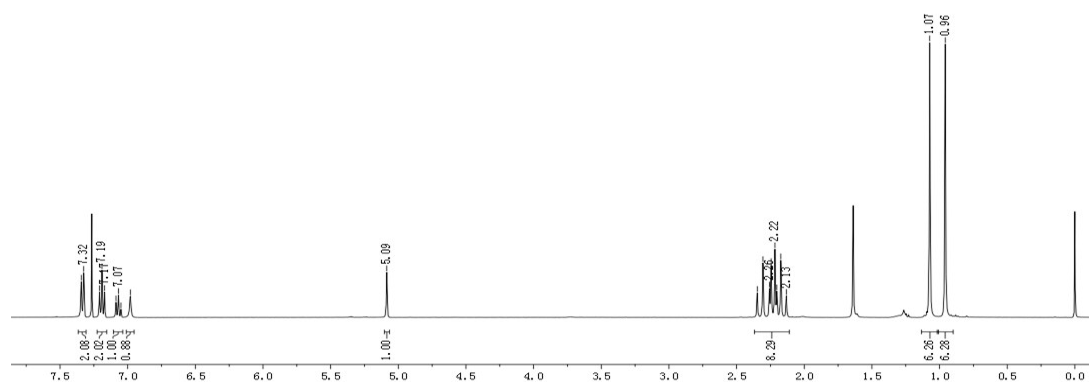

$^{13}\text{C}$  NMR (101 MHz,  $\text{CDCl}_3$ )  $\delta$  195.92, 149.09, 146.61, 128.02, 127.96, 125.99, 113.27, 50.87, 40.70, 33.63, 32.61, 29.56, 27.10.

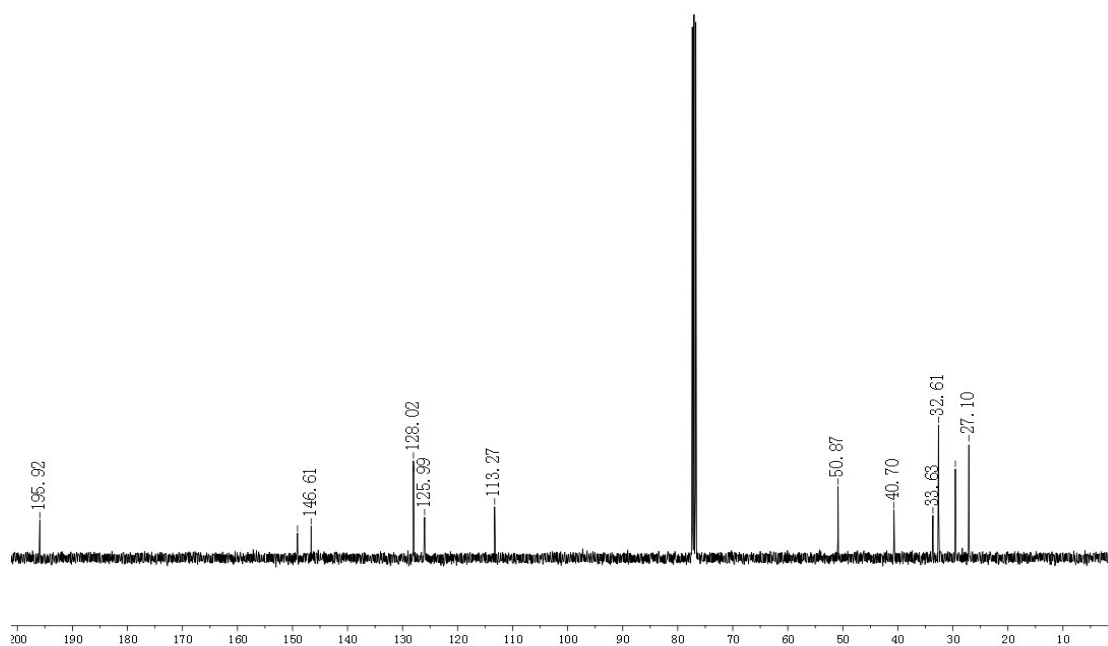

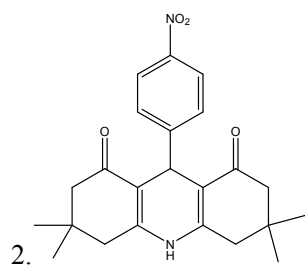

$^1\text{H NMR}$  (400 MHz,  $\text{CDCl}_3$ )  $\delta$  8.08 (t, 2H), 7.54(d, 2H), 6.07 (s, 1H), 5.17 (s, 1H), 2.44-2.13(m, 8H), 1.12 (s, 6H), 0.98 (s, 6H).

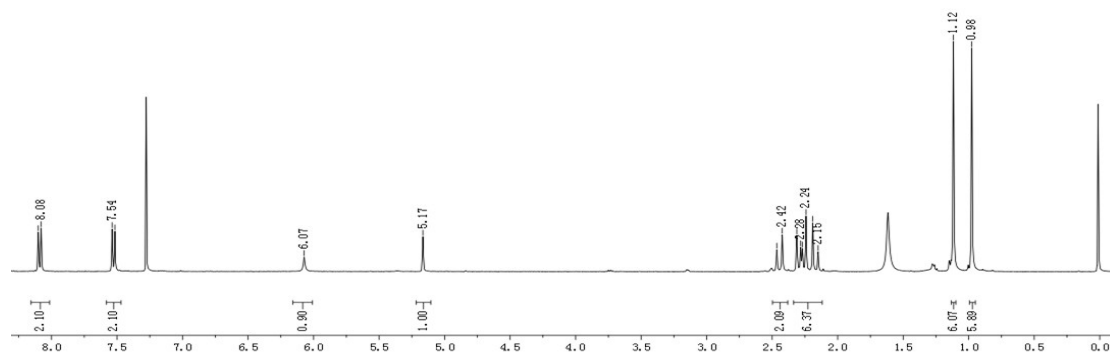

$^{13}\text{C NMR}$  (101 MHz, DMSO)  $\delta$  194.31, 157.60, 154.56, 149.96, 145.45, 128.88, 122.95, 110.39, 50.03, 33.86, 32.11, 28.96, 26.47.

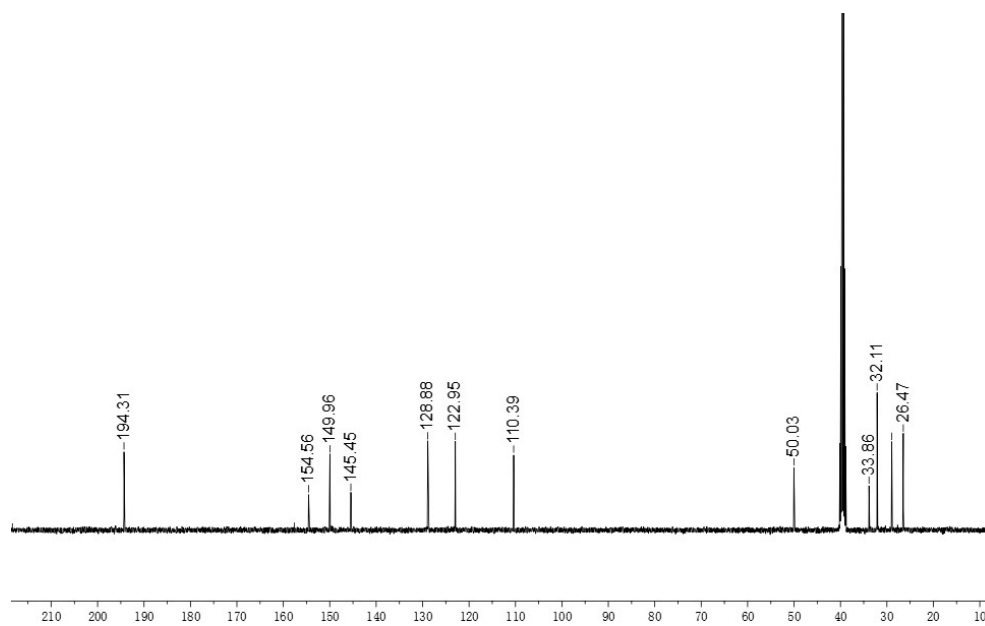

3.

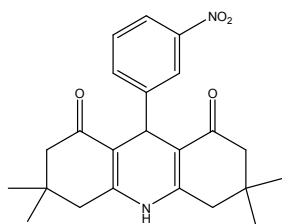

$^1\text{H NMR}$  (400 MHz,  $\text{CDCl}_3$ )  $\delta$  8.10-7.85 (m, 3H), 7.40 (t, 1H), 6.39 (s, 1H), 5.19 (s, 1H), 2.45-2.15 (m, 8H), 1.11 (s, 6H), 0.98 (s, 6H).

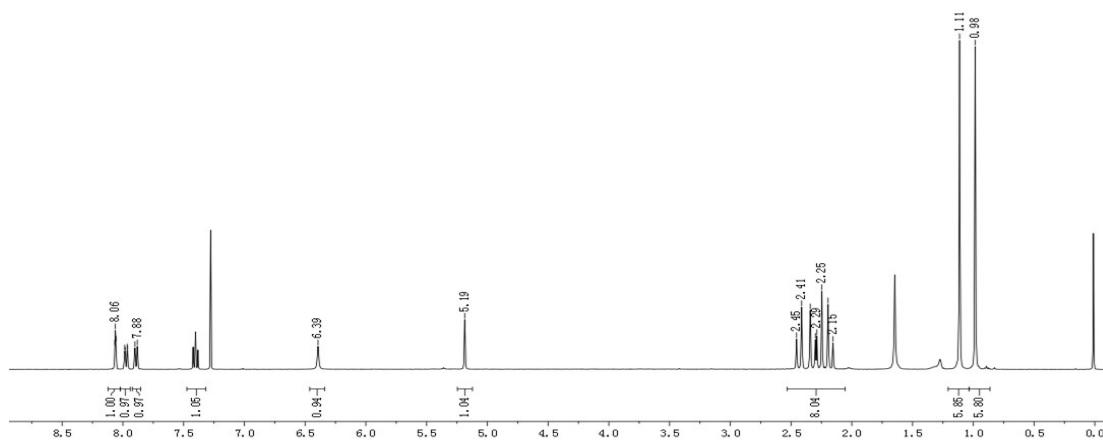

$^{13}\text{C NMR}$  (101 MHz, DMSO)  $\delta$  194.43, 157.59, 150.02, 149.16, 147.31, 134.44, 129.20, 121.97, 120.71, 110.53, 50.01, 33.48, 32.15, 28.99, 26.34.

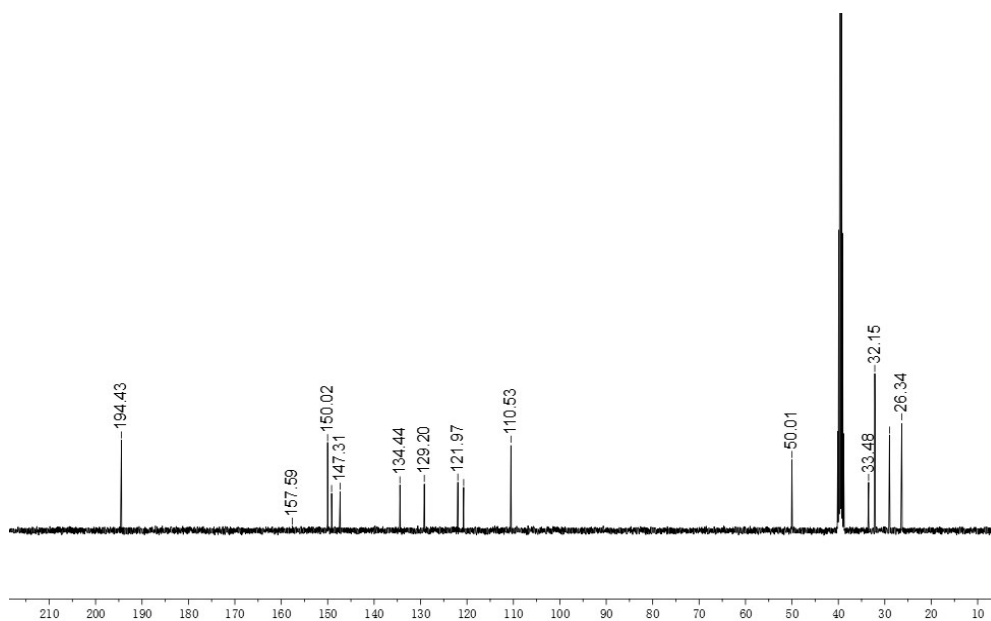

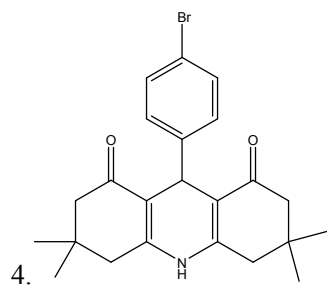

$^1\text{H NMR}$  (400 MHz, DMSO)  $\delta$  9.39 (s, 1H), 7.54 (d, 2H), 7.36 (d, 2H), 4.87 (s, 1H), 2.45-1.97(m, 8H), 1.01 (s, 6H), 0.86 (s, 6H).

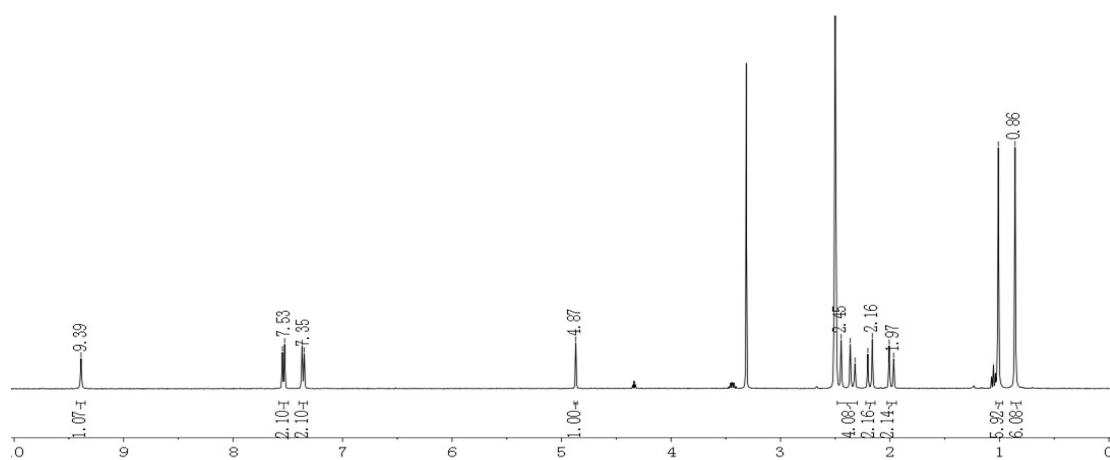

$^{13}\text{C NMR}$  (101 MHz, DMSO)  $\delta$  194.32, 149.46, 146.49, 130.41, 129.88, 118.42, 110.97, 50.13, 32.77, 32.11, 29.01, 26.46.

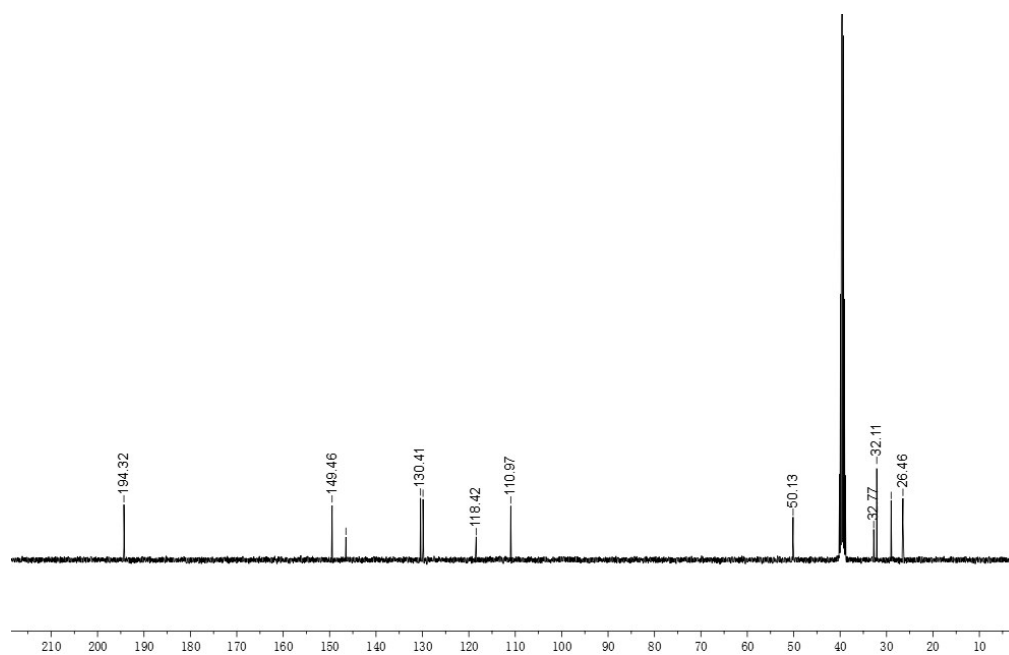

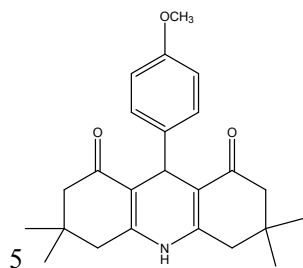

$^1\text{H NMR}$  (400 MHz,  $\text{CDCl}_3$ )  $\delta$  7.56 (s, 1H), 7.26 (d, 2H), 6.72 (d, 2H), 5.03 (s, 1H), 3.68 (s, 3H), 2.20-2.12 (m, 8H), 1.06 (s, 6H), 0.95 (s, 6H).

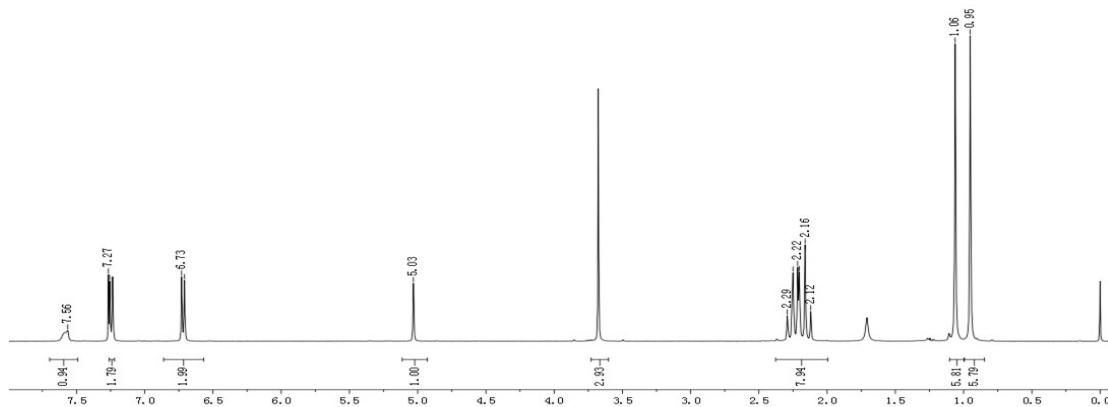

$^{13}\text{C NMR}$  (101 MHz,  $\text{CDCl}_3$ )  $\delta$  195.97, 157.65, 148.80, 139.15, 128.94, 113.45, 113.30, 55.03, 50.87, 40.70, 32.76, 32.60, 29.56, 27.11.

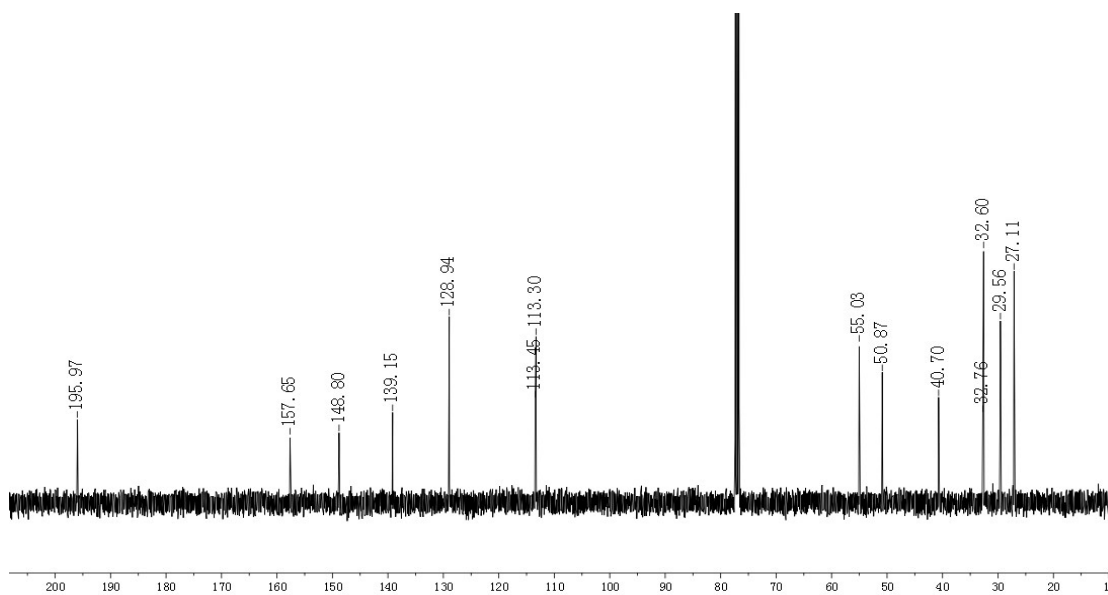

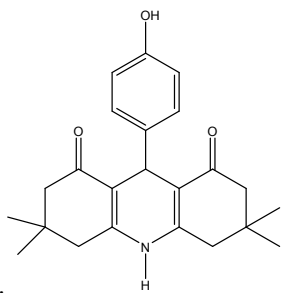

6.

$^1\text{H}$  NMR (400 MHz, DMSO)  $\delta$  9.19 (s, 1H), 8.97 (s, 1H), 6.92 (d, 2H), 6.52 (d, 2H), 4.70 (s, 1H), 2.42-1.98 (m, 8H), 1.00 (s, 6H), 0.87 (s, 6H).

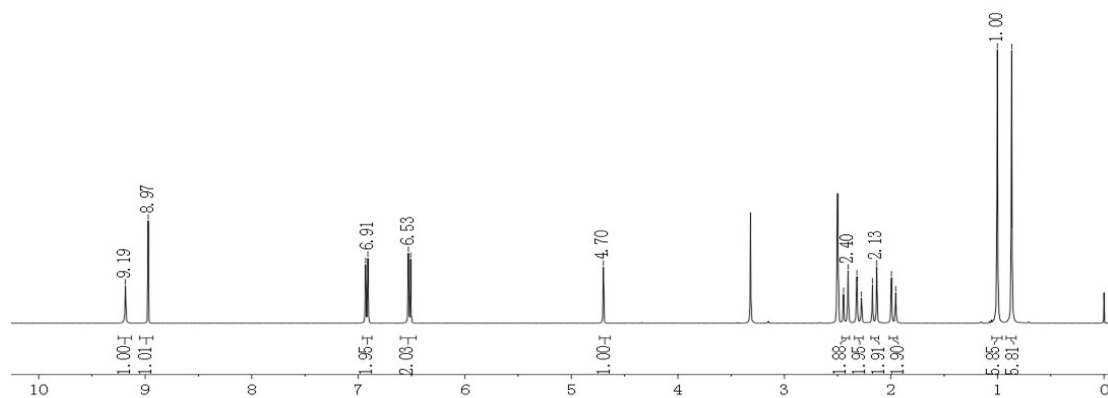

$^{13}\text{C}$  NMR (101 MHz, DMSO)  $\delta$  194.32, 154.99, 148.84, 137.89, 128.39, 114.26, 111.83, 50.29, 32.09, 31.64, 29.09, 26.45.

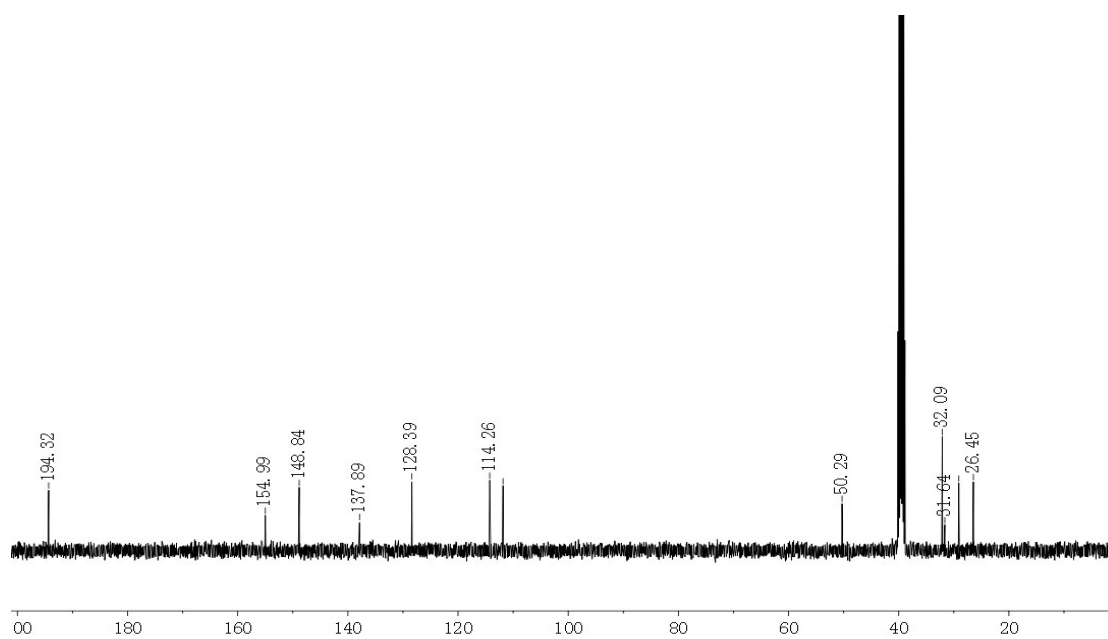

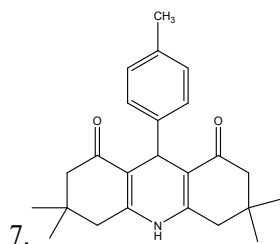

$^1\text{H NMR}$  (400 MHz,  $\text{CDCl}_3$ )  $\delta$  7.23 (d, 2H), 7.00 (d, 2H), 5.06 (s, 1H), 2.50 – 1.96 (m, 11H), 1.08 (s, 6H), 0.97 (s, 6H).

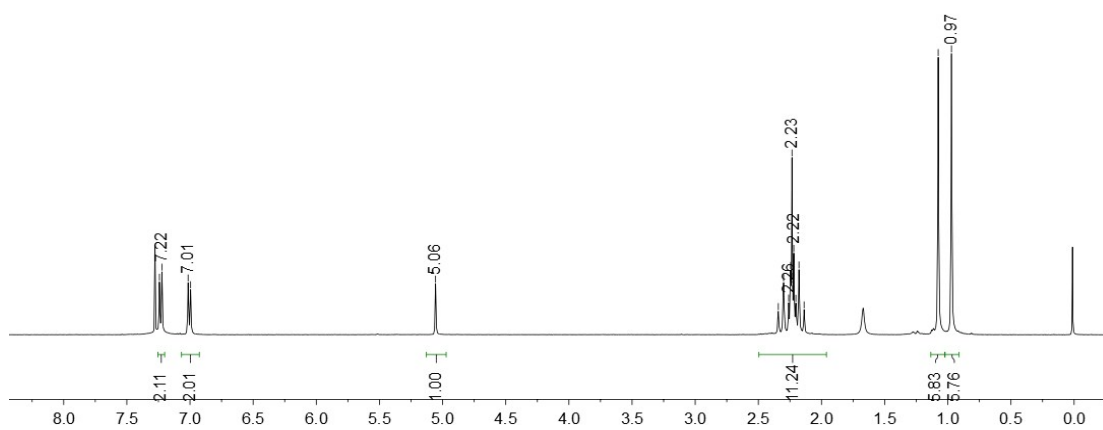

$^{13}\text{C NMR}$  (101 MHz, DMSO)  $\delta$  194.27, 149.07, 144.28, 134.21, 128.09, 127.51, 111.58, 50.24, 32.38, 32.09, 29.09, 26.44, 20.53.

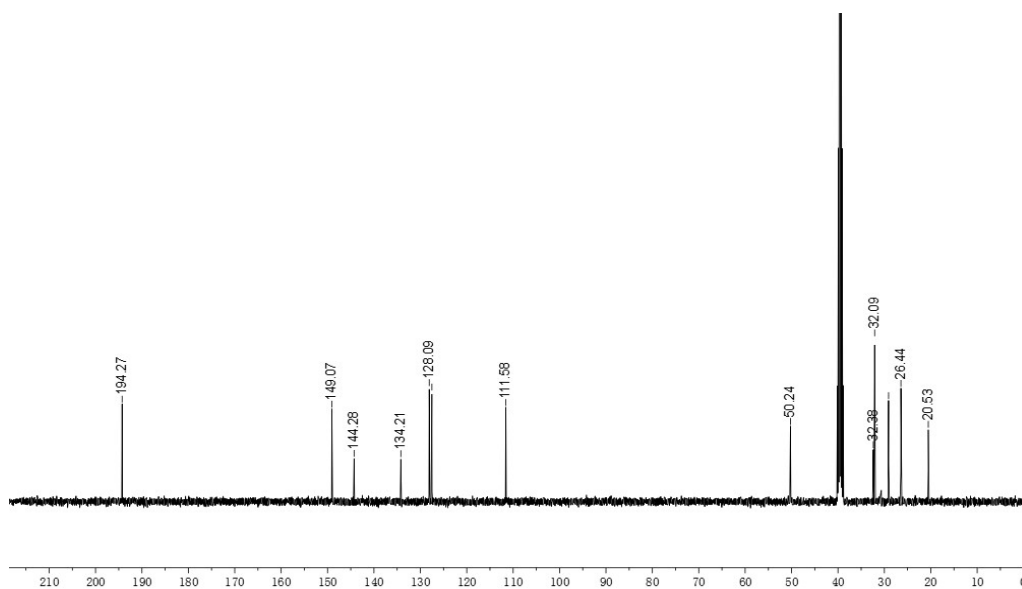

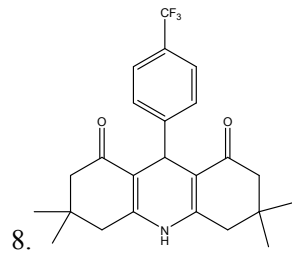

$^1\text{H}$  NMR (400 MHz, DMSO)  $\delta$  9.76 (s, 1H), 7.34 (d, 2H), 7.09 (d, 2H), 4.76 (s, 1H), 2.48-1.97(m, 8H), 1.00 (s, 6H), 0.85 (s, 6H).

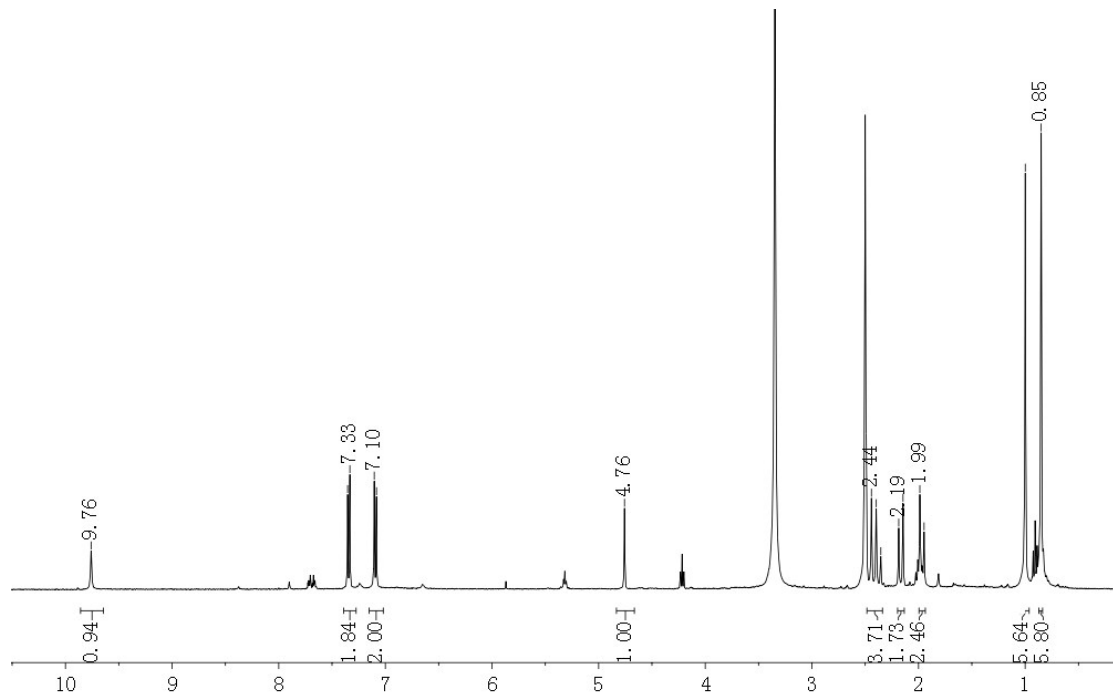

$^{13}\text{C}$  NMR (101 MHz, DMSO)  $\delta$  194.33, 151.57, 149.73, 130.07, 128.40, 124.47, 110.74, 50.09, 33.46, 32.11, 30.64, 28.96, 26.47.

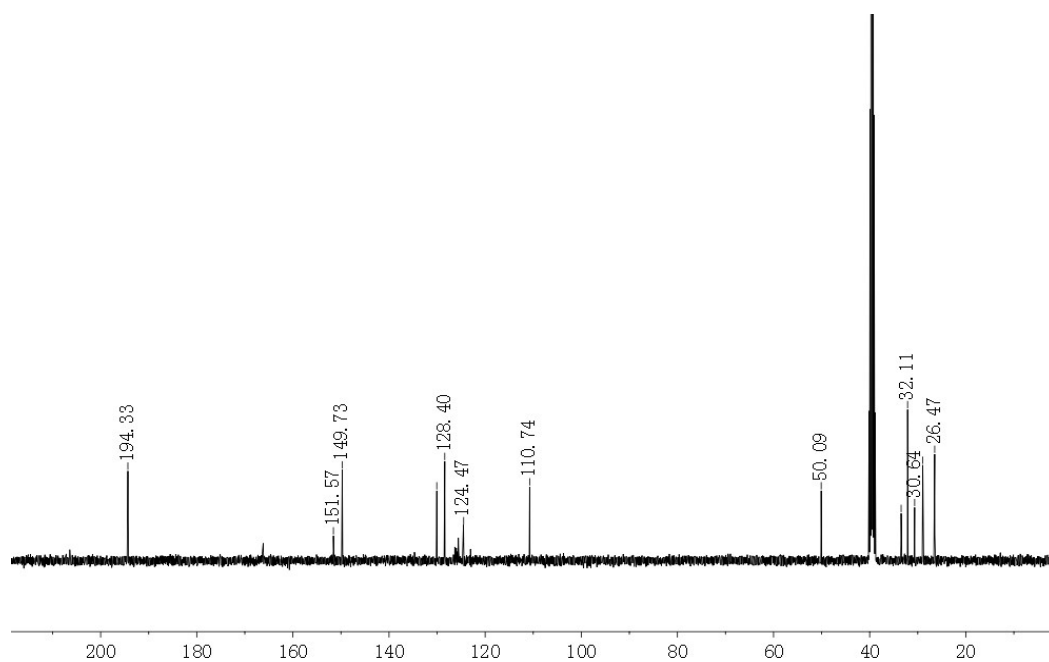



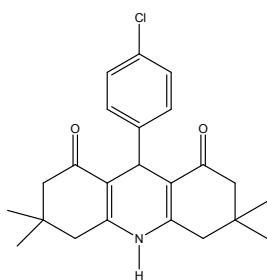

9.

$^1\text{H}$  NMR (400 MHz, DMSO)  $\delta$  9.33 (s, 1H), 7.29 – 7.08 (m, 4H), 4.78 (s, 1H), 2.47-1.96(m, 8H), 1.01 (s, 6H), 0.86 (s, 6H).

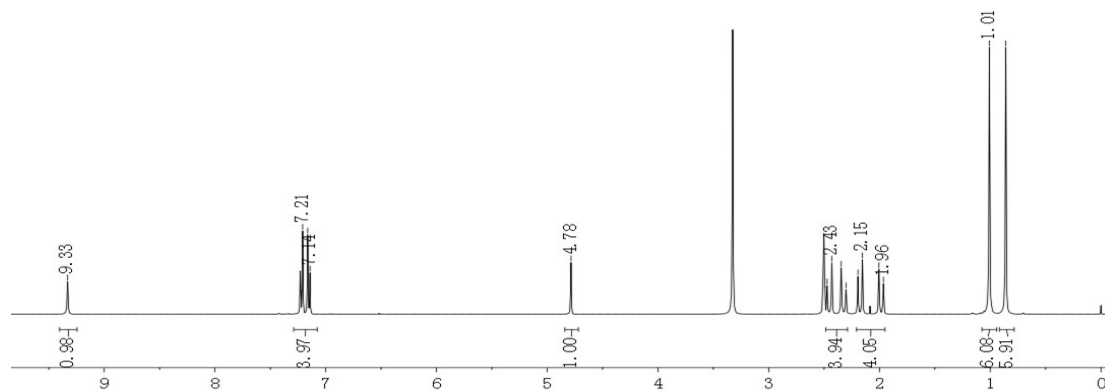

$^{13}\text{C}$  NMR (151 MHz, DMSO)  $\delta$  194.83, 149.97, 146.56, 130.42, 129.93, 128.00, 111.53, 50.64, 33.15, 32.62, 29.52, 26.95.

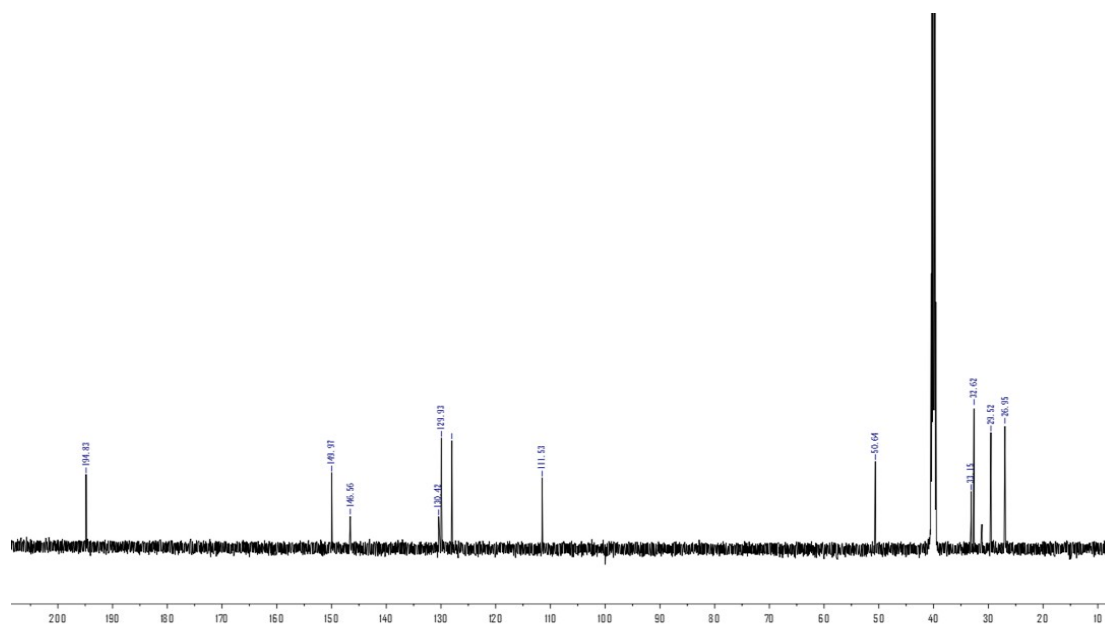

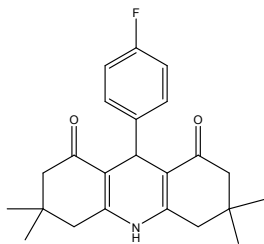

10.

$^1\text{H NMR}$  (400 MHz,  $\text{CDCl}_3$ )  $\delta$  7.31 (dd, 2H), 6.88 (t, 2H), 6.04 (s, 1H), 5.06 (s, 1H), 2.42-2.16 (m, 8H), 1.10 (s, 6H), 0.98 (s, 6H).

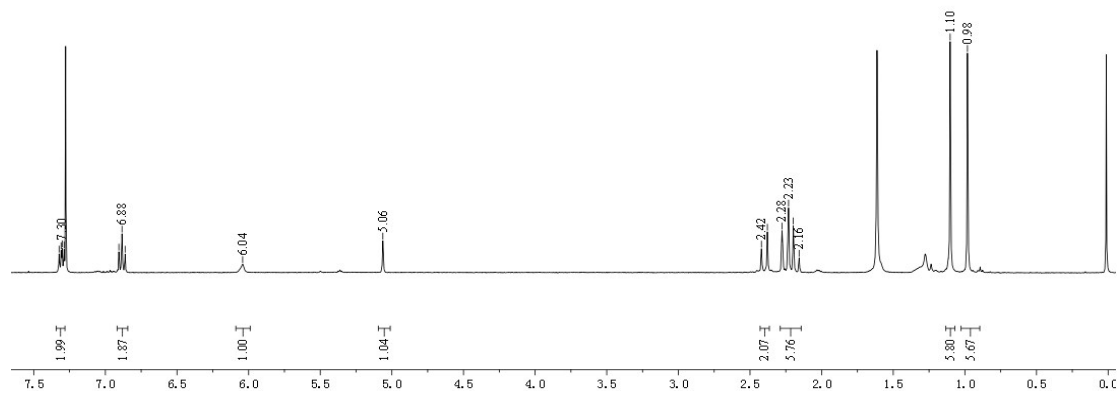

$^{13}\text{C NMR}$  (101 MHz, DMSO)  $\delta$  194.33, 149.33, 143.32, 134.09, 132.26, 129.23, 129.15, 114.25, 114.04, 111.28, 50.16, 32.25, 32.10, 30.65, 29.02, 26.45.

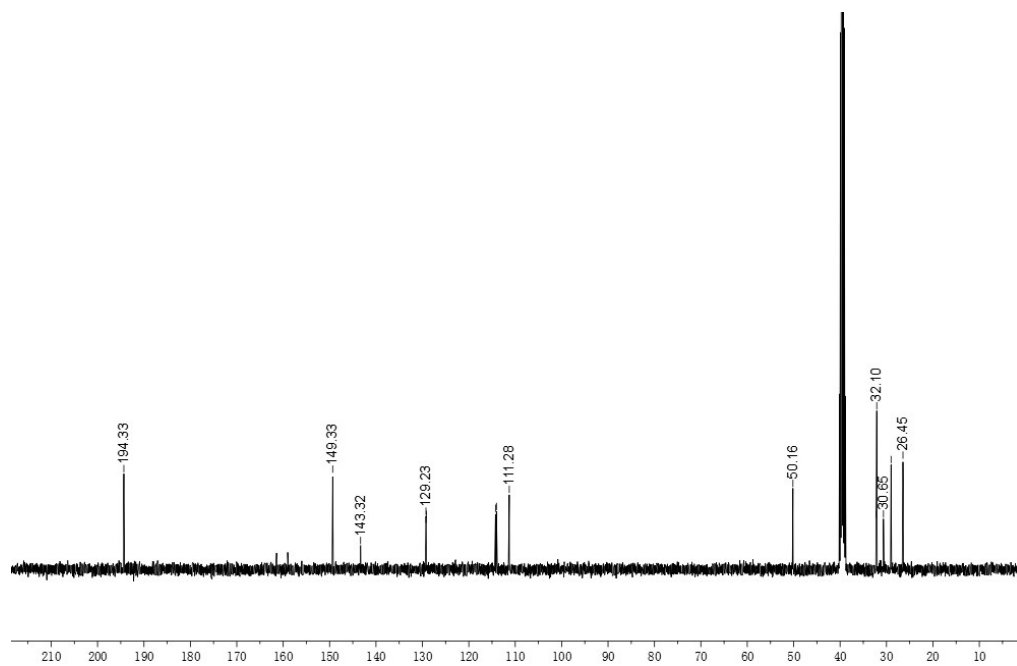

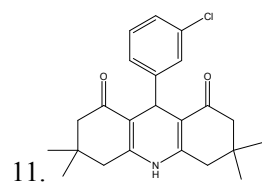

$^1\text{H NMR}$  (400 MHz, DMSO)  $\delta$  9.36 (s, 1H), 7.21 (t, 1H), 7.15 (s, 1H), 7.12-7.07 (m, 2H), 4.79 (s, 1H), 2.48-1.99(m, 8H), 1.01 (s, 6H), 0.87 (s, 6H).

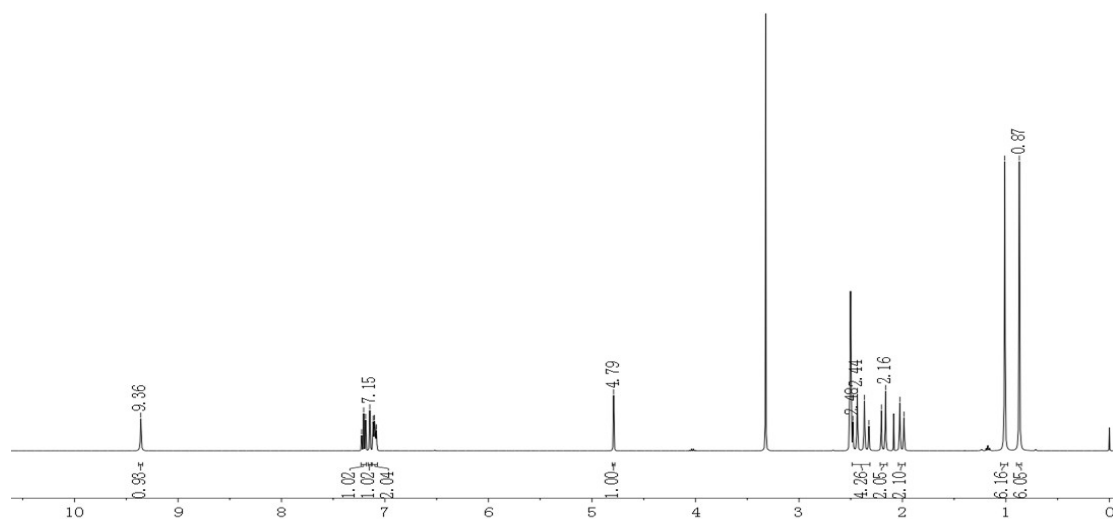

$^{13}\text{C NMR}$  (101 MHz, DMSO)  $\delta$  194.36, 149.66, 149.39, 132.15, 129.54, 127.54, 126.18, 125.46, 110.80, 50.11, 33.03, 32.14, 29.00, 26.38.

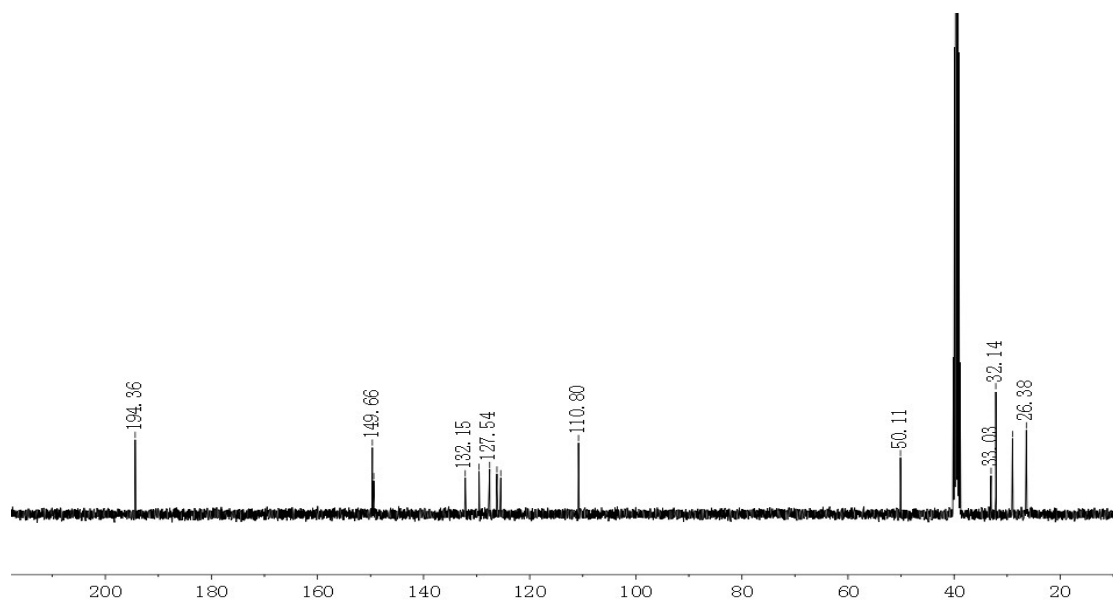

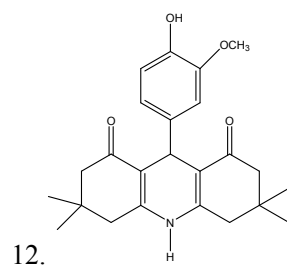

$^1\text{H}$  NMR (400 MHz, DMSO)  $\delta$  9.21 (s, 1H), 8.55 (s, 1H), 6.70 (s, 1H), 6.52 (s, 2H), 4.72 (s, 1H), 3.65 (s, 3H), 2.46-1.98(m, 8H), 1.01 (s, 6H), 0.88 (s, 6H).

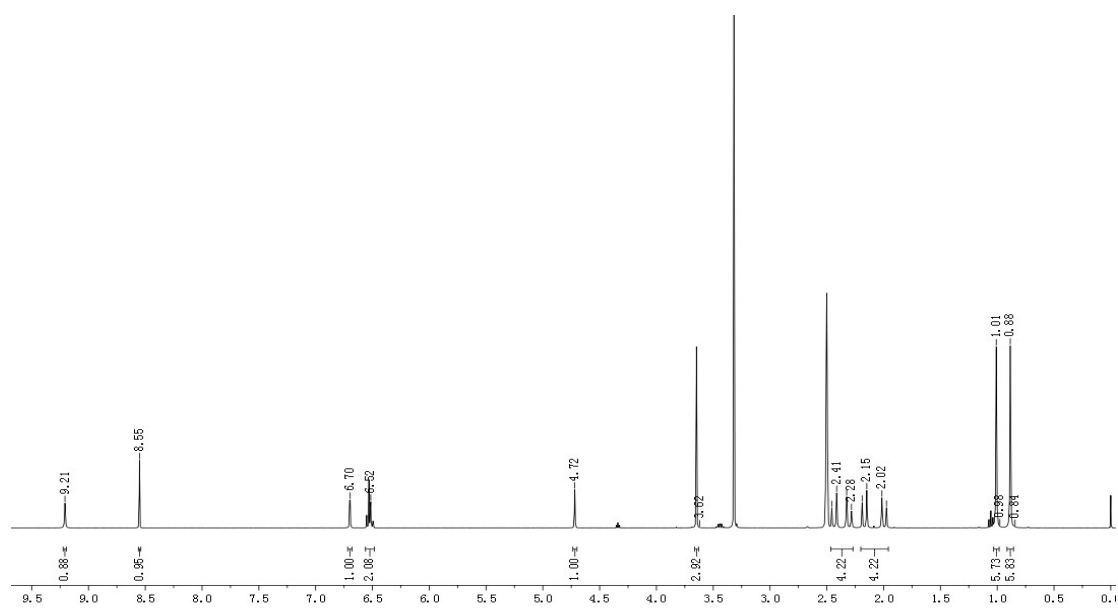

$^{13}\text{C}$  NMR (101 MHz, DMSO)  $\delta$  194.42, 148.94, 146.67, 144.32, 138.48, 119.75, 114.73, 112.21, 111.74, 56.00, 55.47, 50.30, 32.08, 31.87, 29.15, 26.35, 18.53.

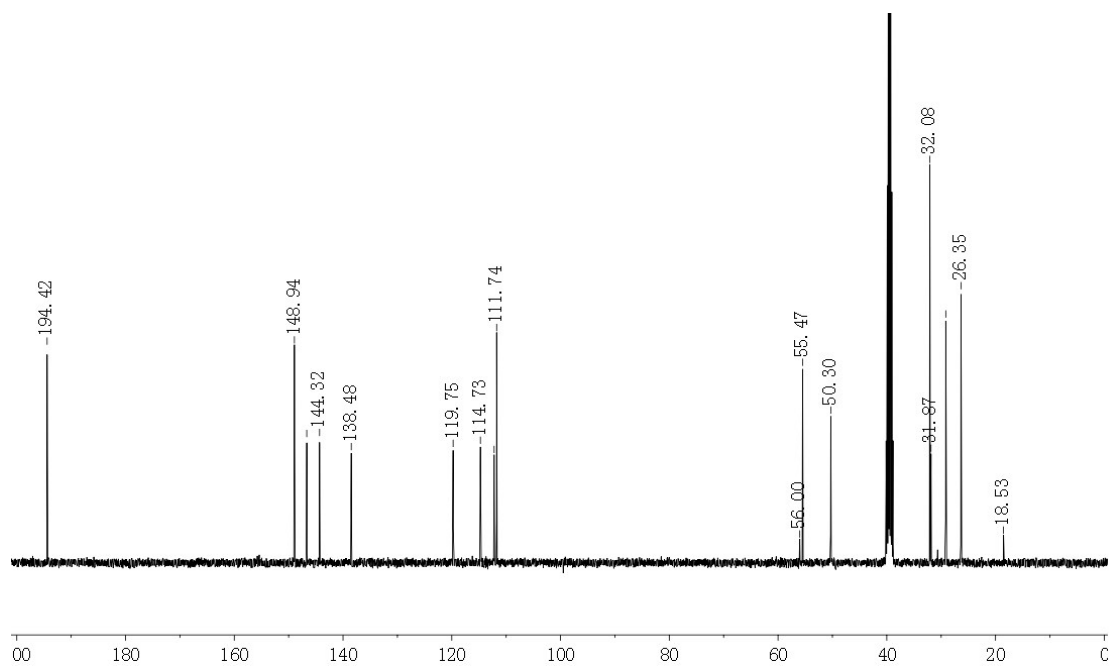

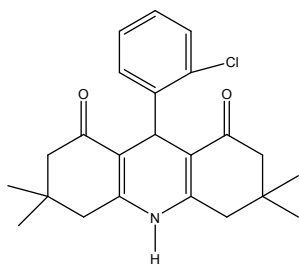

13.

$^1\text{H}$  NMR (400 MHz, DMSO)  $\delta$  9.34 (s, 1H), 7.33-7.00 (m, 4H), 5.07 (s, 1H), 2.47-1.90 (m, 8H), 1.00 (s, 6H), 0.86 (s, 6H).

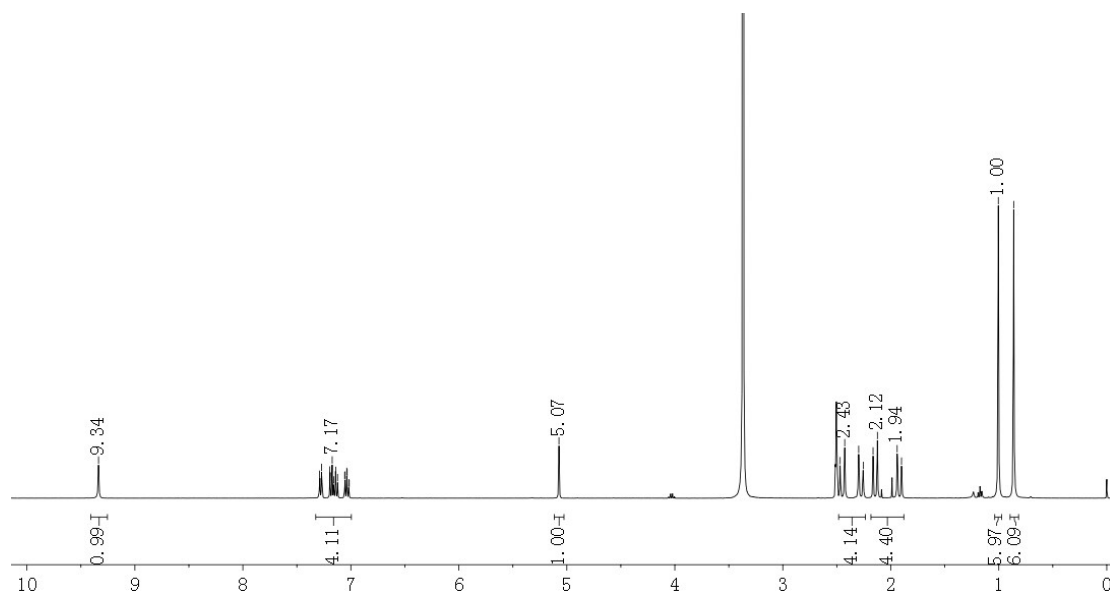

$^{13}\text{C}$  NMR (101 MHz, DMSO)  $\delta$  194.12, 149.65, 144.06, 132.26, 129.03, 126.96, 126.12, 110.71, 50.20, 32.92, 31.90, 29.10, 26.30.

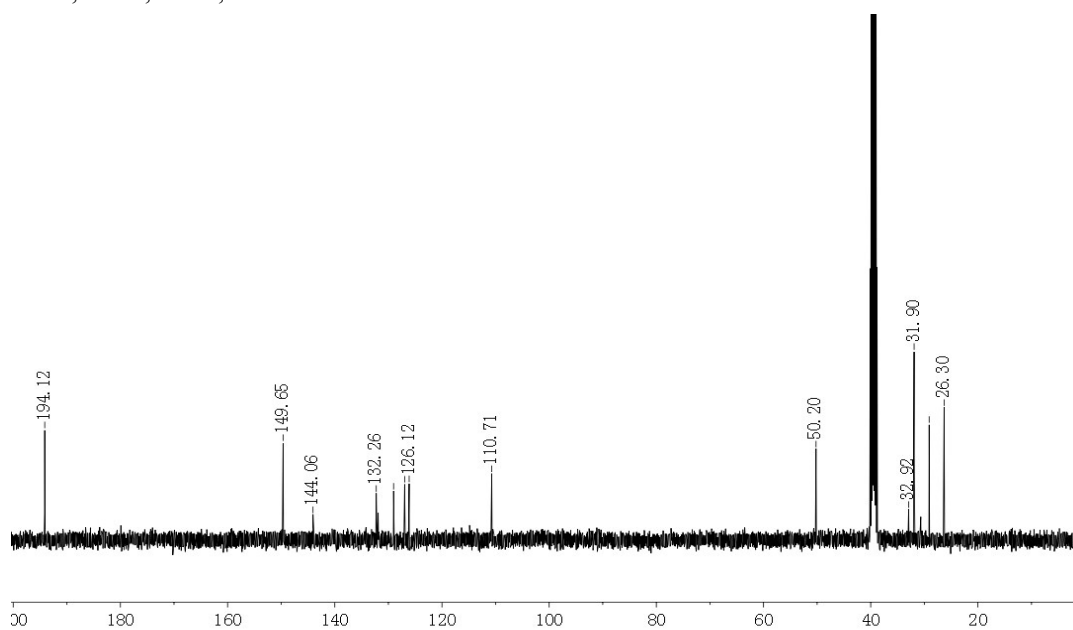

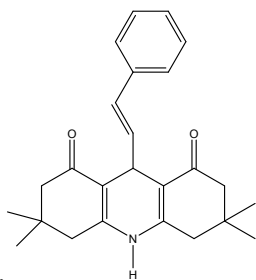

14.

$^1\text{H}$  NMR (400 MHz, DMSO)  $\delta$  7.13 (t, 2H), 7.05-7.00 (m, 2H), 6.86 (d, 1H), 4.51-4.40 (m, 1H), 3.61 (dd, 1H), 3.44 (dd, 1H), 2.32-1.87 (m, 8H), 1.09-0.95 (m, 12H).

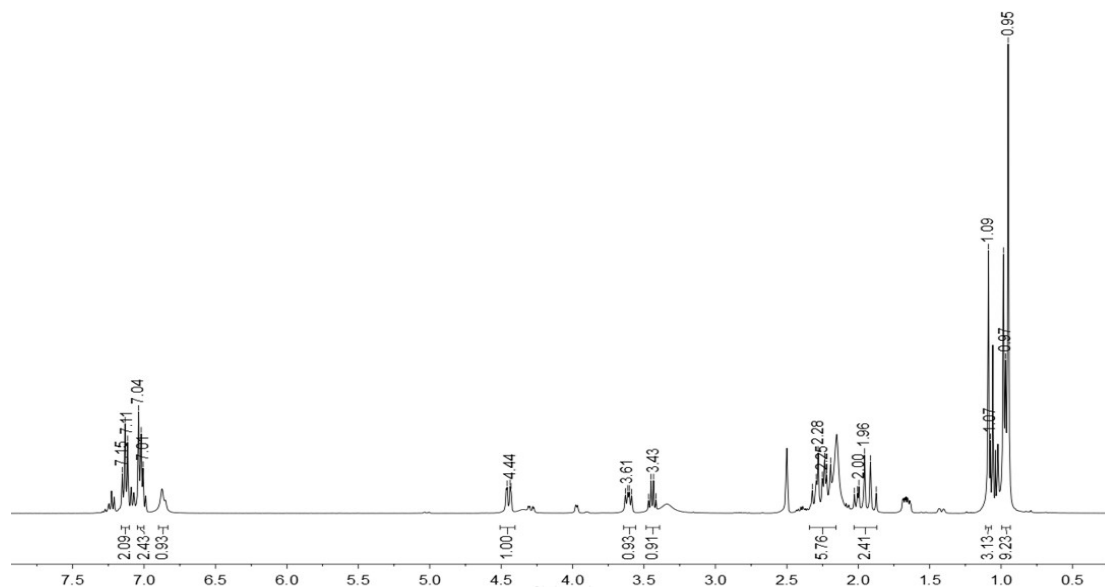

$^{13}\text{C}$  NMR (101 MHz, DMSO)  $\delta$  189.61, 160.00, 148.38, 127.47, 126.38, 124.33, 111.87, 103.82, 56.00, 50.40, 45.70, 41.77, 38.27, 31.30, 29.09, 27.85, 27.46, 18.53.

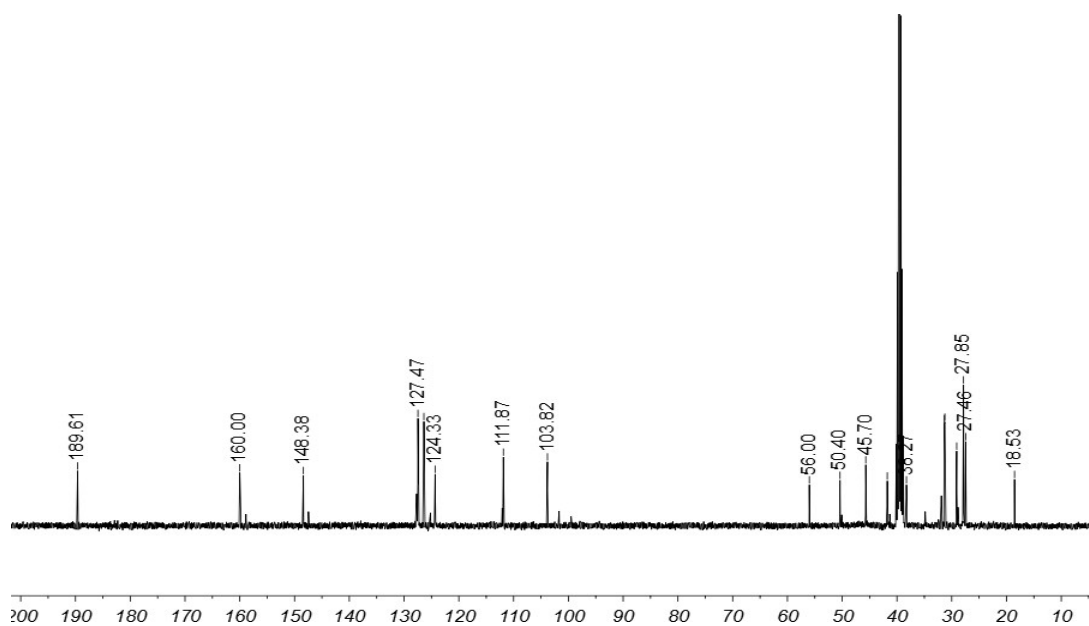

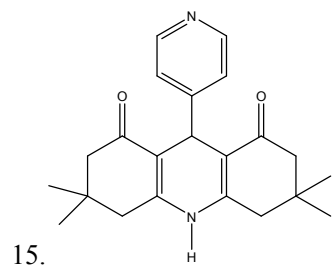

$^1\text{H}$  NMR (400 MHz, DMSO)  $\delta$  9.42 (s, 1H), 8.35 (s, 2H), 7.12 (s, 2H), 4.80 (s, 1H), 2.39-1.97 (m, 8H), 1.01 (s, 6H), 0.87 (s, 6H).

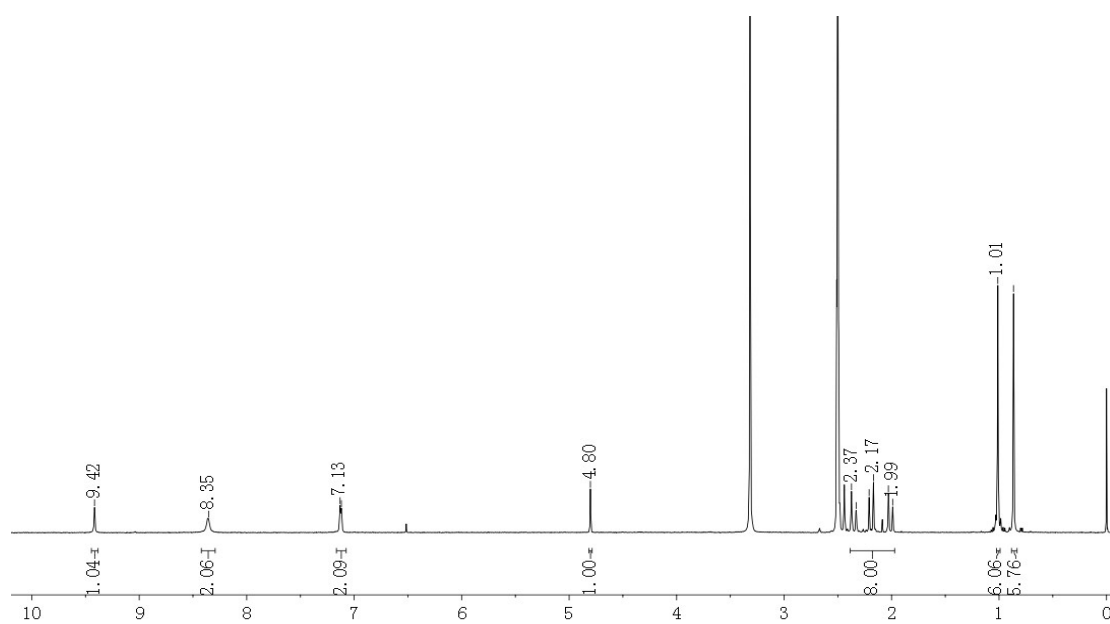

$^{13}\text{C}$  NMR (151 MHz, DMSO)  $\delta$  194.76, 150.56, 149.46, 123.39, 110.55, 50.56, 33.41, 32.62, 29.45, 26.98.

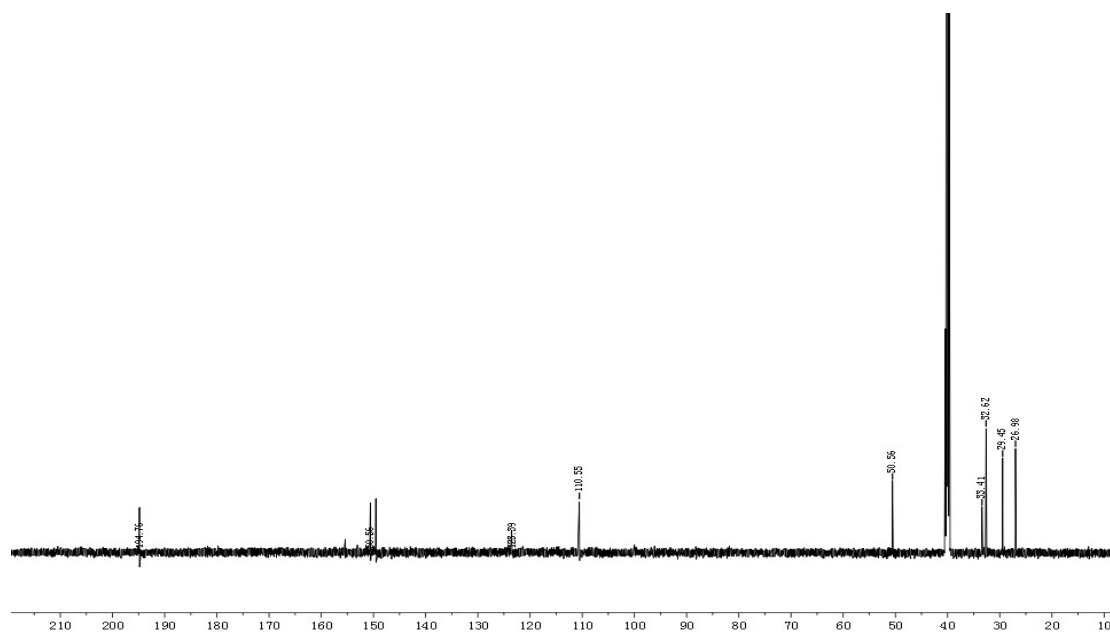

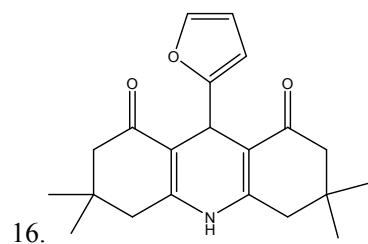

$^1\text{H NMR}$  (400 MHz, DMSO)  $\delta$  9.35 (s, 1H), 7.31 (s, 1H), 6.21 (dd, 1H), 5.81 (d, 1H), 4.99 (s, 1H), 2.43-2.04 (m, 8H), 1.02 (s, 6H), 0.92 (s, 6H).

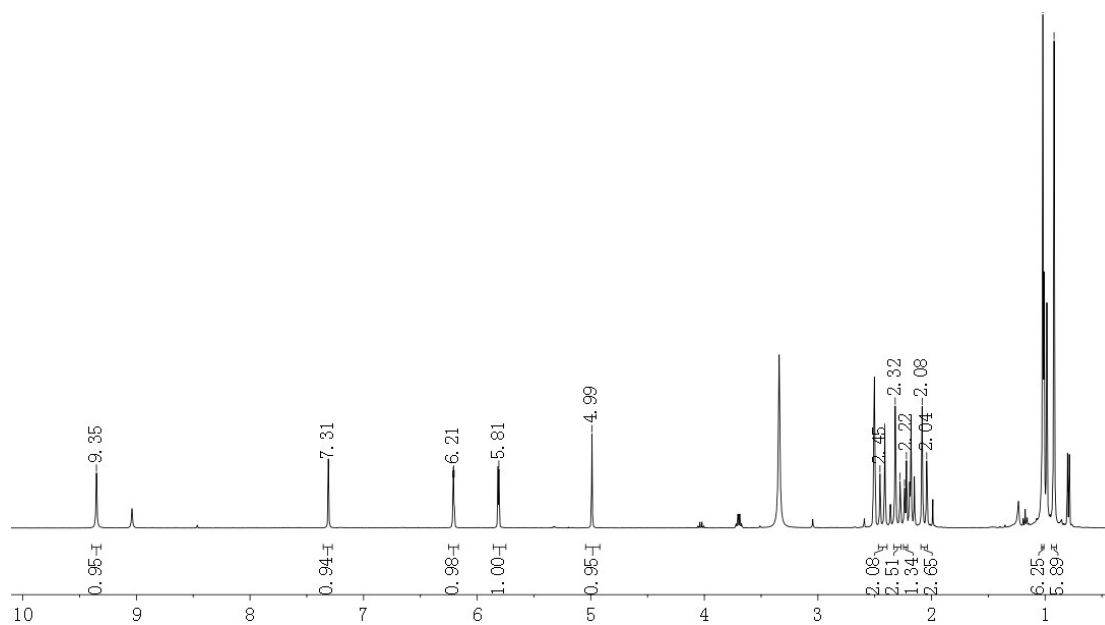

$^{13}\text{C NMR}$  (101 MHz, DMSO)  $\delta$  194.22, 158.05, 150.02, 140.39, 112.28, 110.12, 108.41, 103.97, 50.21, 32.07, 29.09, 26.37, 26.23, 26.13.

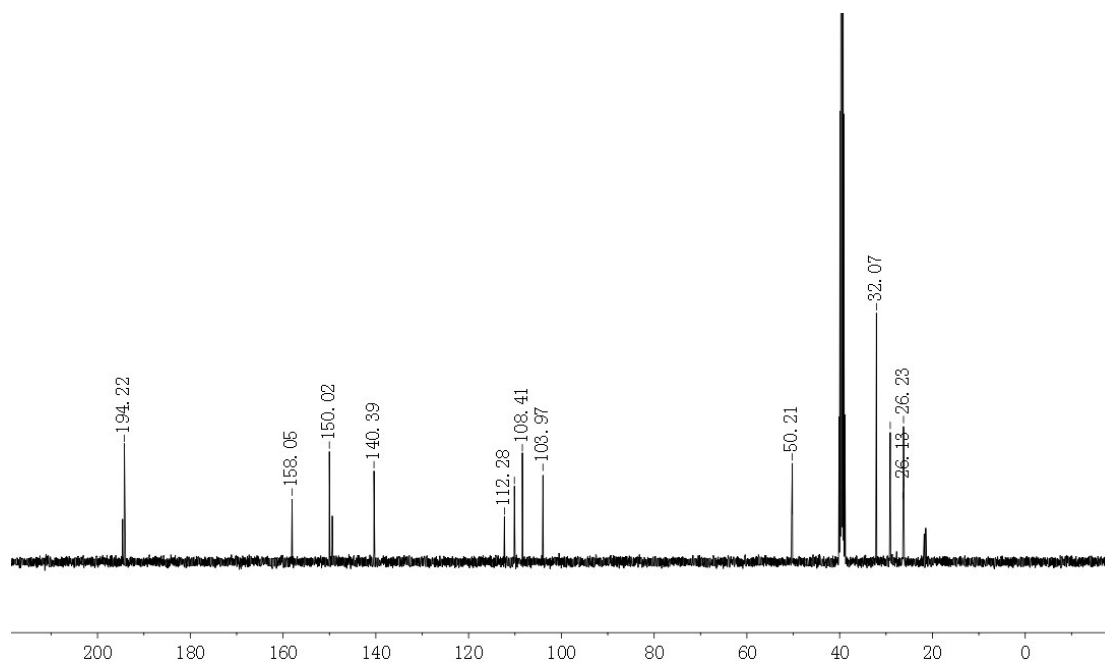



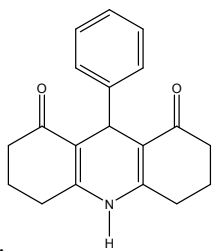

17.

$^1\text{H NMR}$  (400 MHz, DMSO)  $\delta$  9.42 (s, 1H), 7.19-7.09 (m, 4H), 7.03 (ddd, 1H), 4.91 (s, 1H), 2.58-2.51 (m, 4H), 2.21-2.20 (m, 4H), 1.97-1.69 (m, 4H).

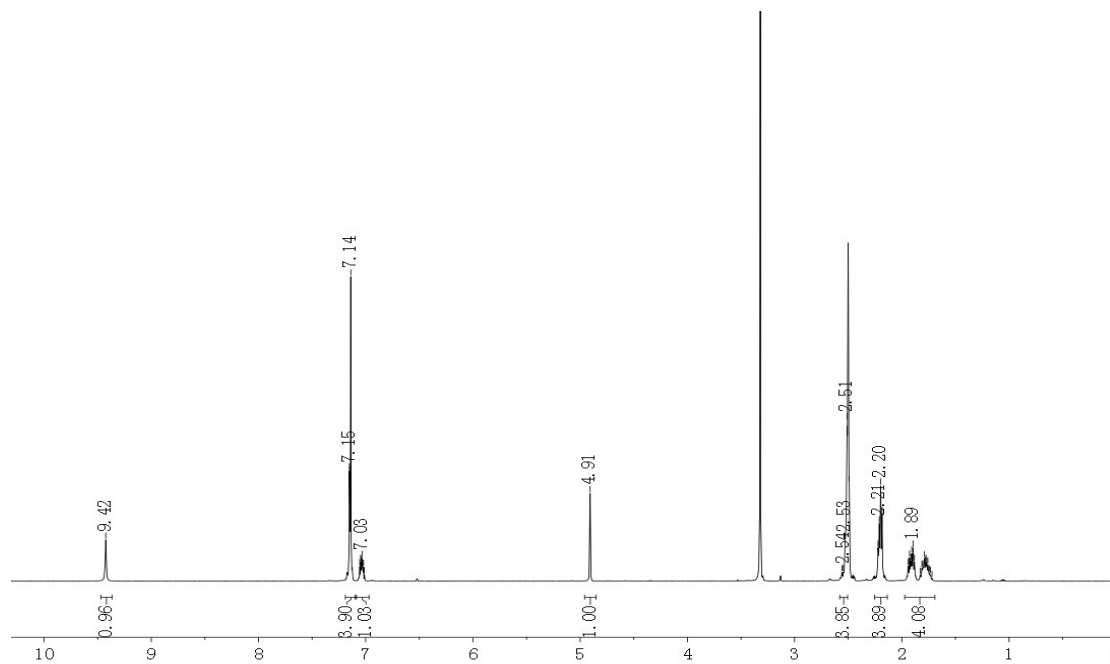

$^{13}\text{C NMR}$  (151 MHz, DMSO)  $\delta$  195.25, 151.77, 147.82, 128.21, 127.96, 125.89, 112.92, 37.26, 32.58, 26.80, 21.27.

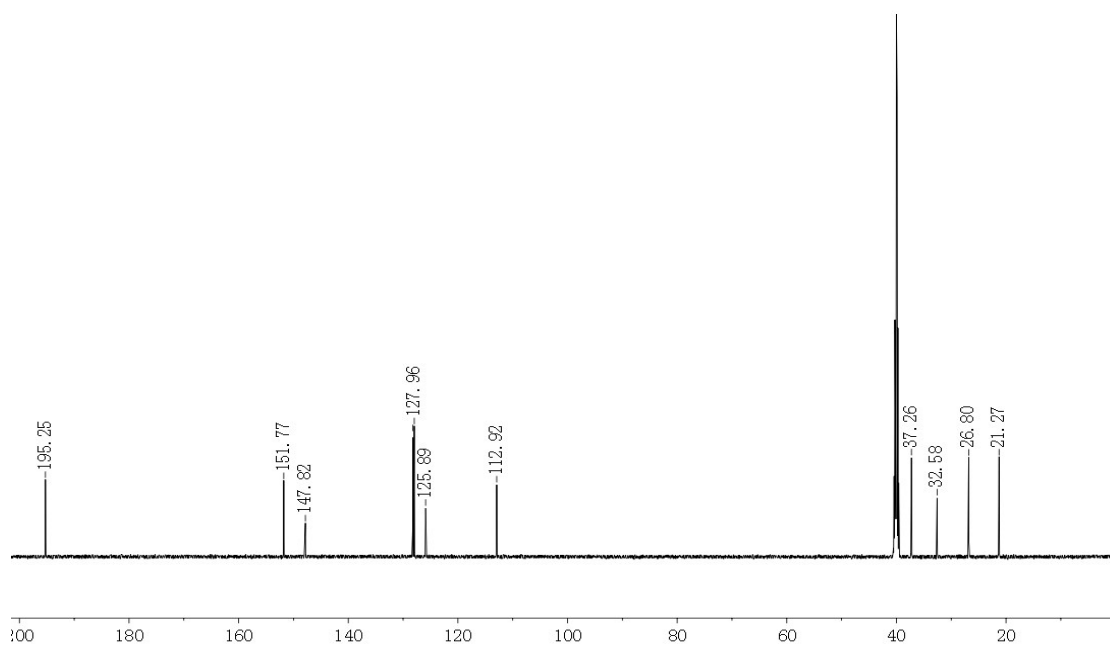

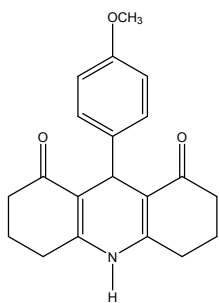

18.

$^1\text{H}$  NMR (400 MHz, DMSO)  $\delta$  9.38 (s, 1H), 7.04 (d, 2H), 6.71 (d, 2H), 4.84 (s, 1H), 3.66 (s, 3H), 2.50-2.43 (m, 4H), 2.20-2.19 (m, 4H), 1.96-1.71 (m, 4H).

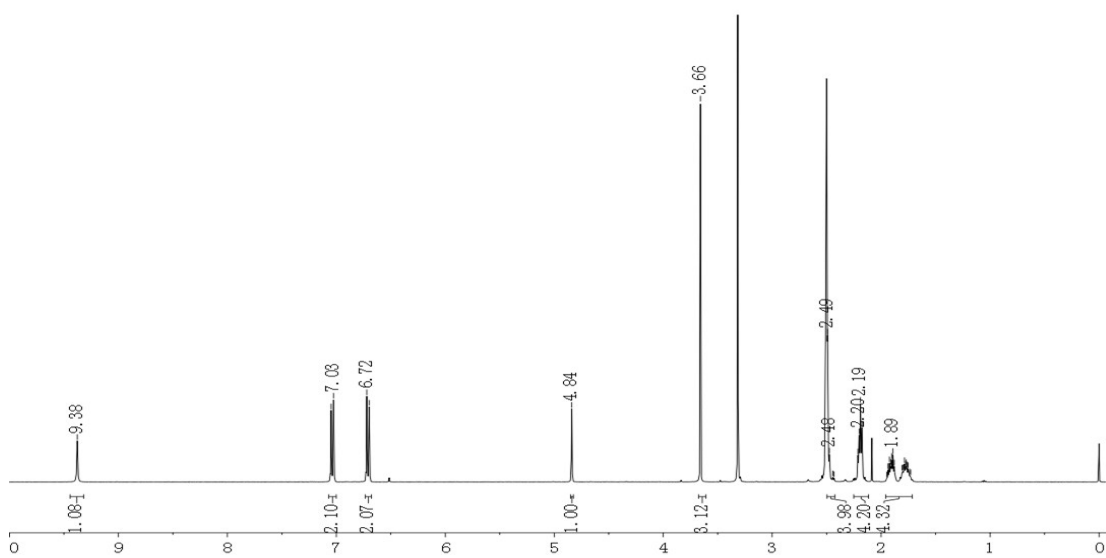

$^{13}\text{C}$  NMR (151 MHz, DMSO)  $\delta$  206.96, 195.25, 157.61, 151.47, 140.17, 128.85, 113.59, 113.20, 55.34, 37.28, 31.64, 31.16, 26.78, 21.30.

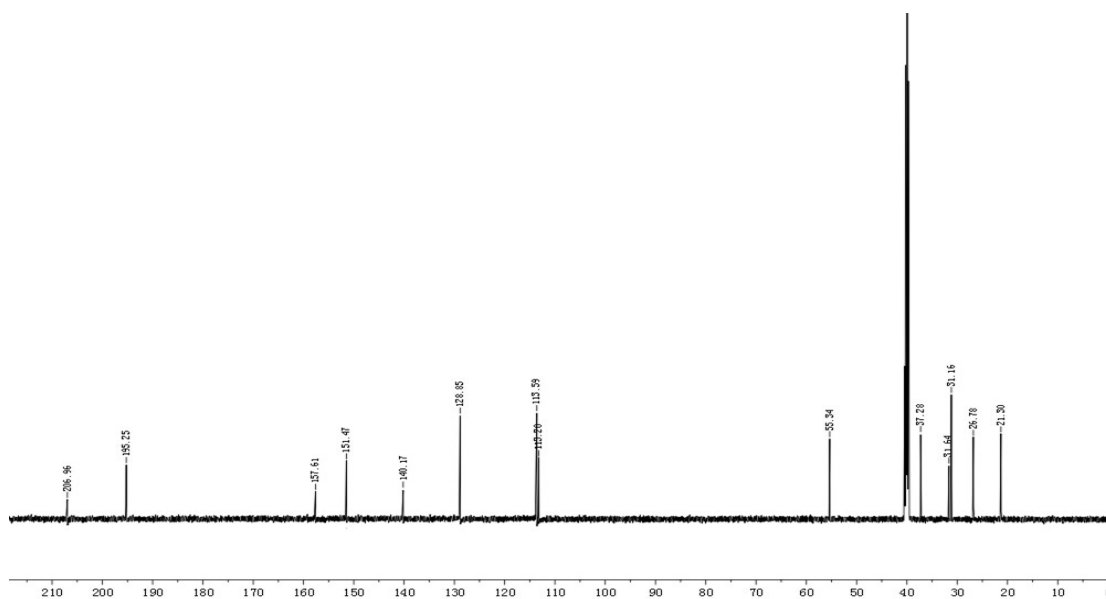

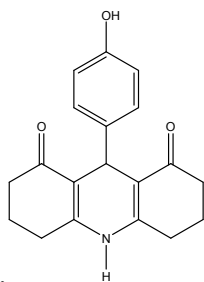

19.

$^1\text{H}$  NMR (400 MHz, DMSO)  $\delta$  9.35 (s, 1H), 8.99 (s, 1H), 6.72 (dd, 4H), 4.80 (s, 1H), 2.56-2.41 (m, 4H), 2.19-2.17(m,4H), 1.99-1.67(m, 4H).

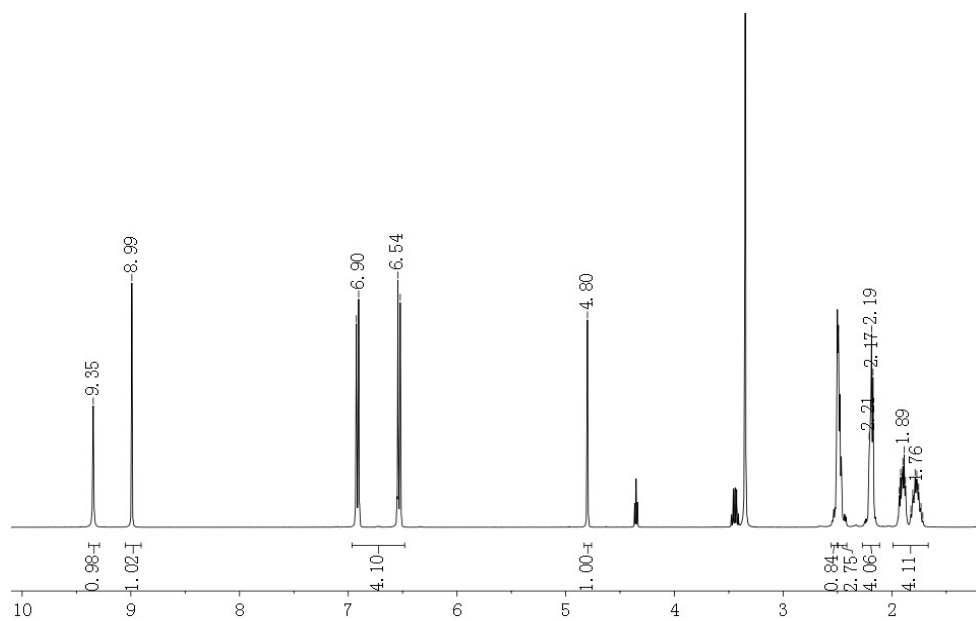

$^{13}\text{C}$  NMR (101 MHz, DMSO)  $\delta$  194.78, 155.06, 150.85, 138.00, 128.27, 114.41, 112.86, 56.00, 36.81, 30.93, 26.29, 20.79, 18.52.

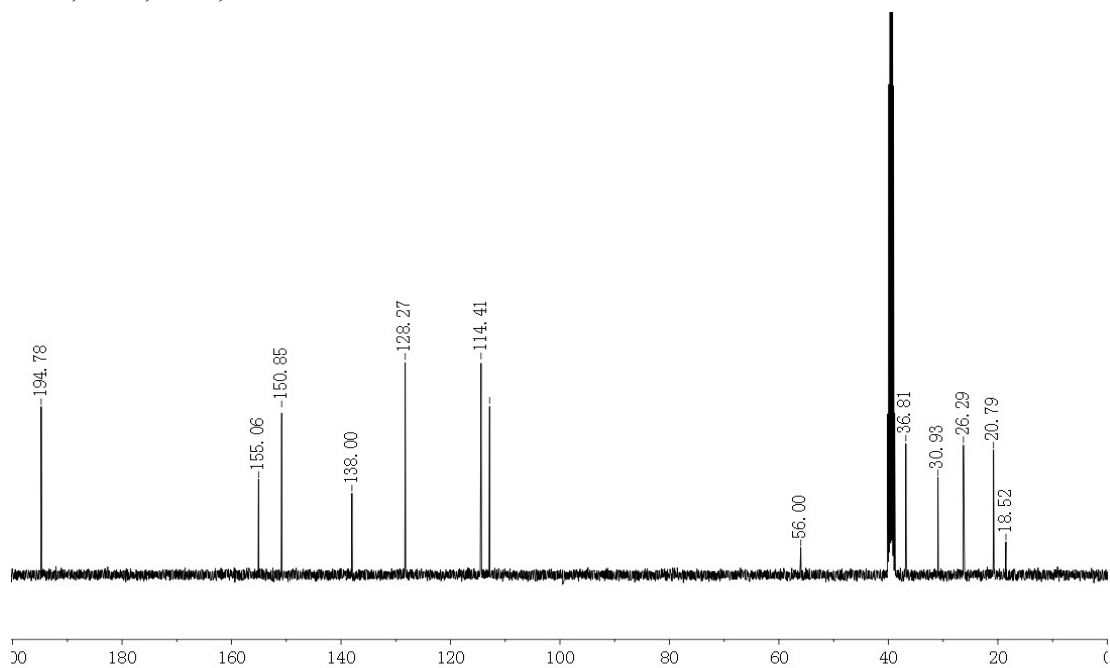

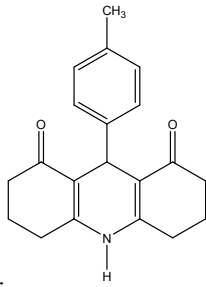

20.

$^1\text{H}$  NMR (400 MHz, DMSO)  $\delta$  9.39 (s, 1H), 6.98 (dd, 4H), 4.87 (s, 1H), 2.55-2.46 (m, 4H), 2.26-2.12 (m, 7H), 1.96-1.68 (m, 4H).

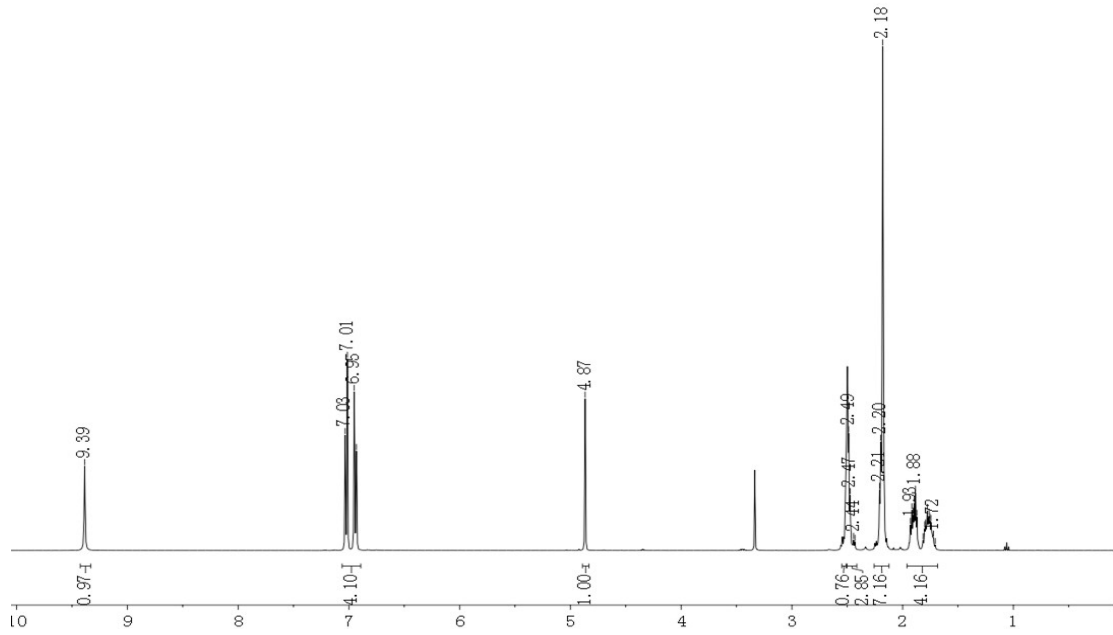

$^{13}\text{C}$  NMR (151 MHz, DMSO)  $\delta$  195.21, 151.56, 144.97, 134.74, 128.77, 127.86, 113.09, 37.27, 32.15, 26.80, 21.30, 21.02.

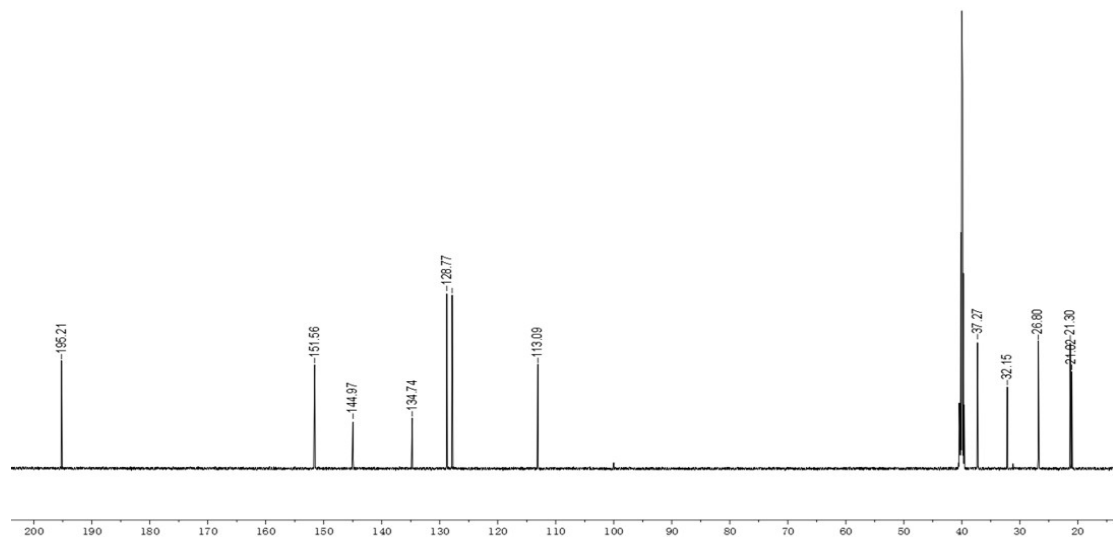

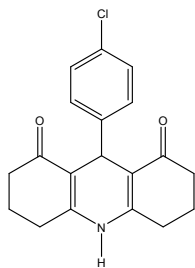

21.

$^1\text{H NMR}$  (400 MHz, DMSO)  $\delta$  9.47 (s, 1H), 7.18 (dd, 4H), 4.88 (s, 1H), 2.56-2.50 (m, 4H), 2.22-2.20 (m, 4H), 1.97-1.71 (m, 4H).

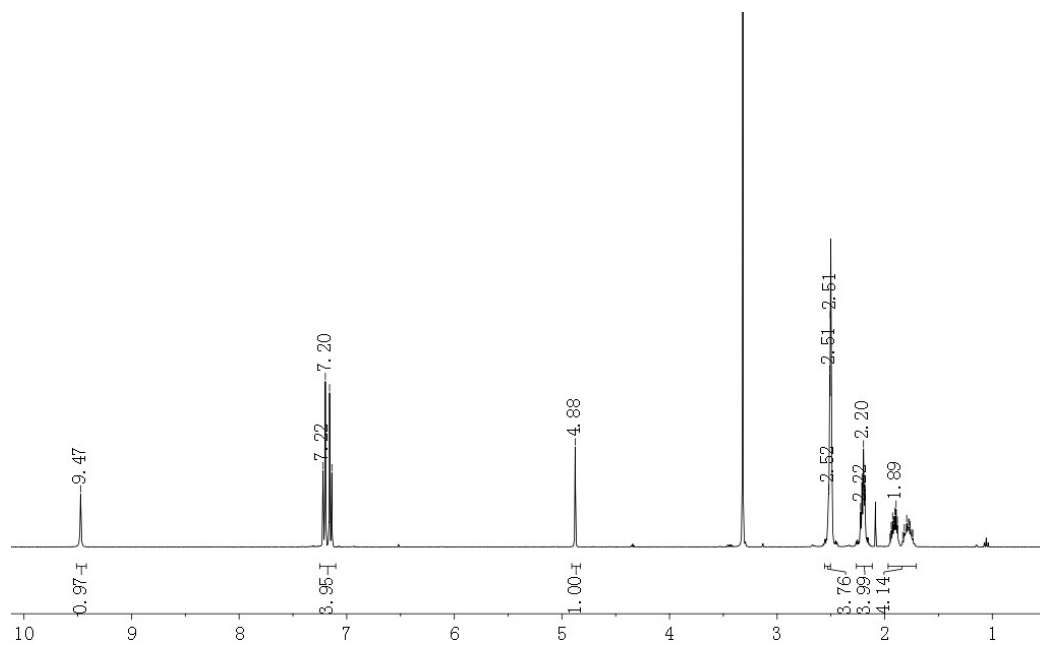

$^{13}\text{C NMR}$  (151 MHz, DMSO)  $\delta$  195.25, 152.03, 146.54, 130.46, 129.85, 128.14, 112.47, 37.19, 32.36, 26.49, 21.24.

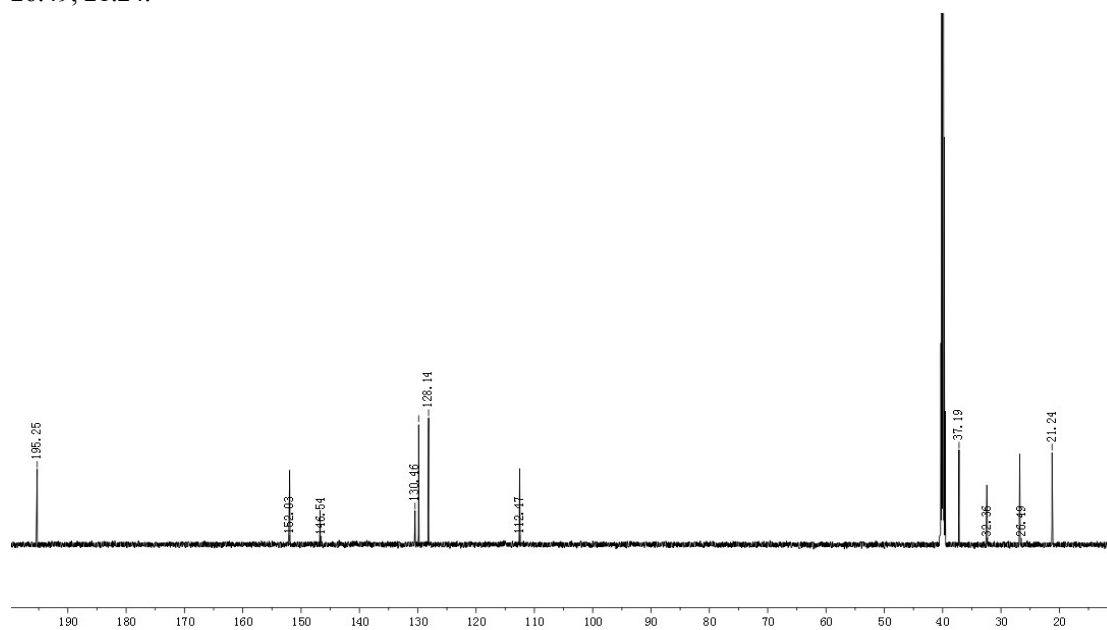

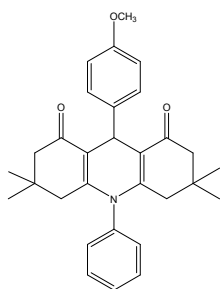

22.

$^1\text{H}$  NMR (400 MHz, DMSO)  $\delta$  7.65 – 7.55 (m, 3H), 7.40 (s, 2H), 7.23 (d, 2H), 6.81 (d, 2H), 5.00 (s, 1H), 3.69 (s, 3H), 2.19-1.74 (m, 8H), 0.87 (s, 6H), 0.72 (s, 6H).

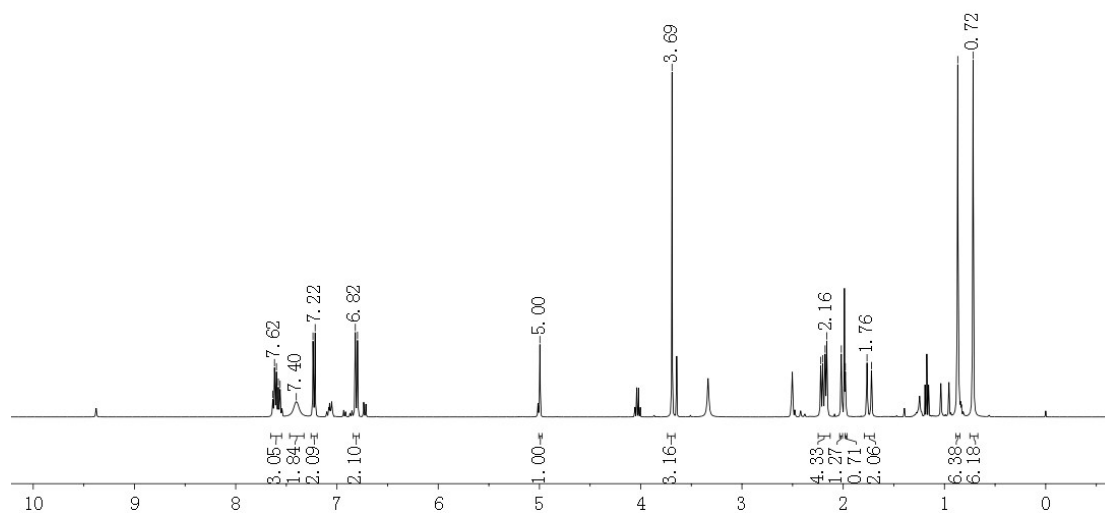

$^{13}\text{C}$  NMR (101 MHz, DMSO)  $\delta$  195.03, 157.26, 149.97, 138.58, 138.47, 129.35, 128.42, 127.76, 113.37, 113.21, 113.18, 59.72, 54.82, 49.55, 40.92, 32.00, 31.91, 30.92, 29.27, 26.73, 26.08, 20.73, 14.05.

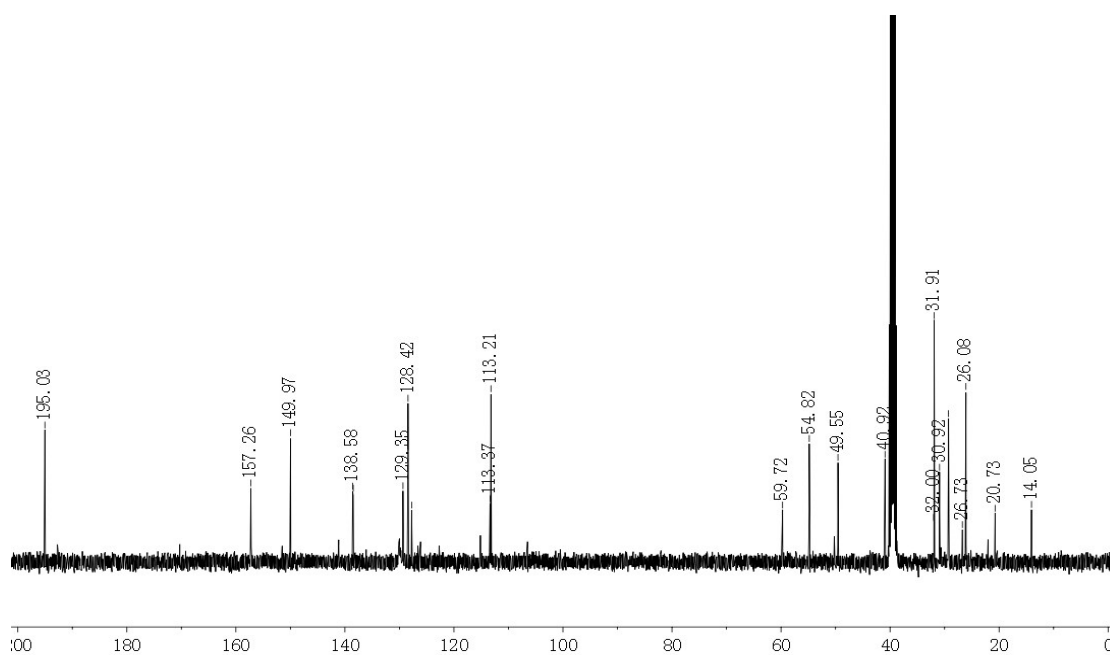

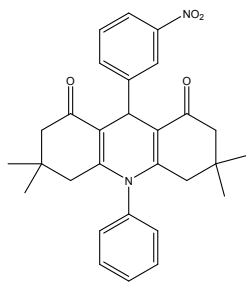

23.

$^1\text{H}$  NMR (400 MHz, DMSO)  $\delta$  8.15 (s, 1H), 8.06 – 7.32 (m, 8H), 5.15 (s, 1H), 2.23-1.91 (m, 4H), 0.89 (s, 6H), 0.70 (s, 6H).

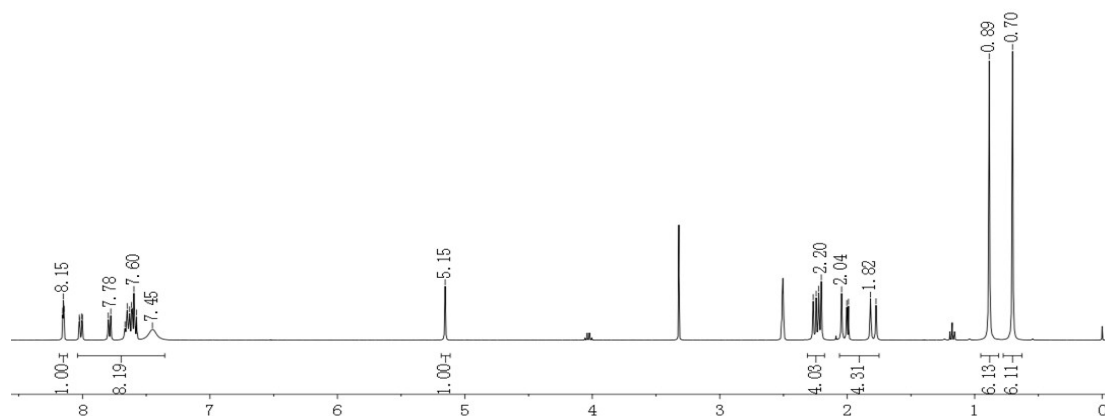

$^{13}\text{C}$  NMR (101 MHz, DMSO)  $\delta$  195.10, 151.06, 148.24, 147.44, 138.14, 134.25, 129.68, 129.56, 121.99, 121.00, 112.10, 49.32, 40.90, 32.42, 31.99, 29.15, 25.99.

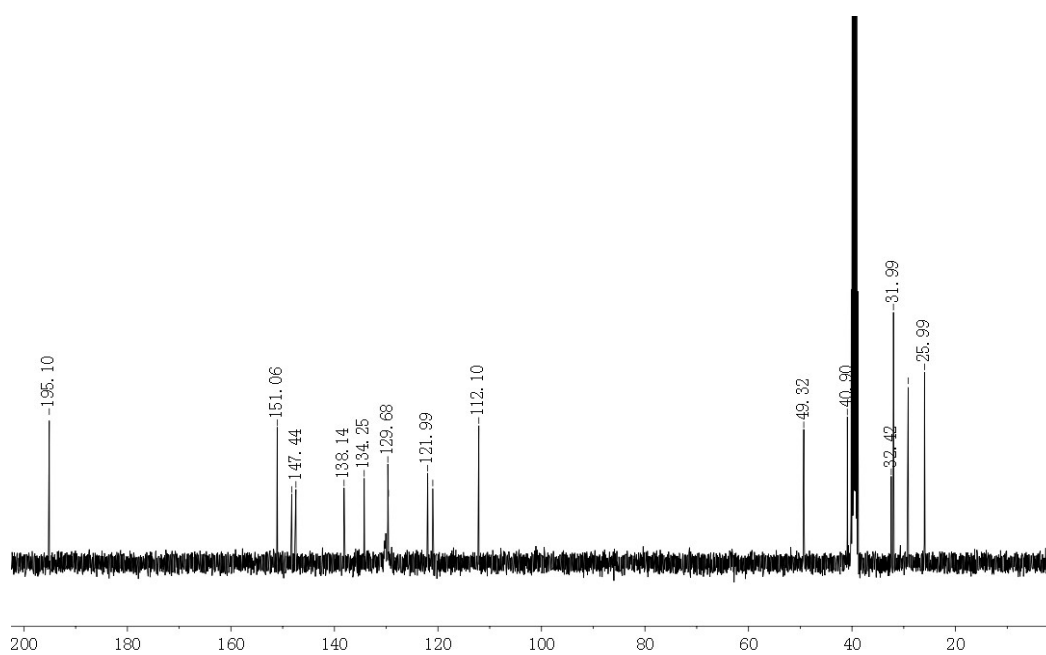

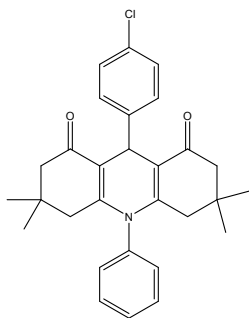

24.

$^1\text{H NMR}$  (400 MHz, DMSO)  $\delta$  7.68 – 7.26 (m, 9H), 5.03 (s, 1H), 2.20-1.76 (m, 8H), 0.87 (s, 6H), 0.71 (s, 6H).

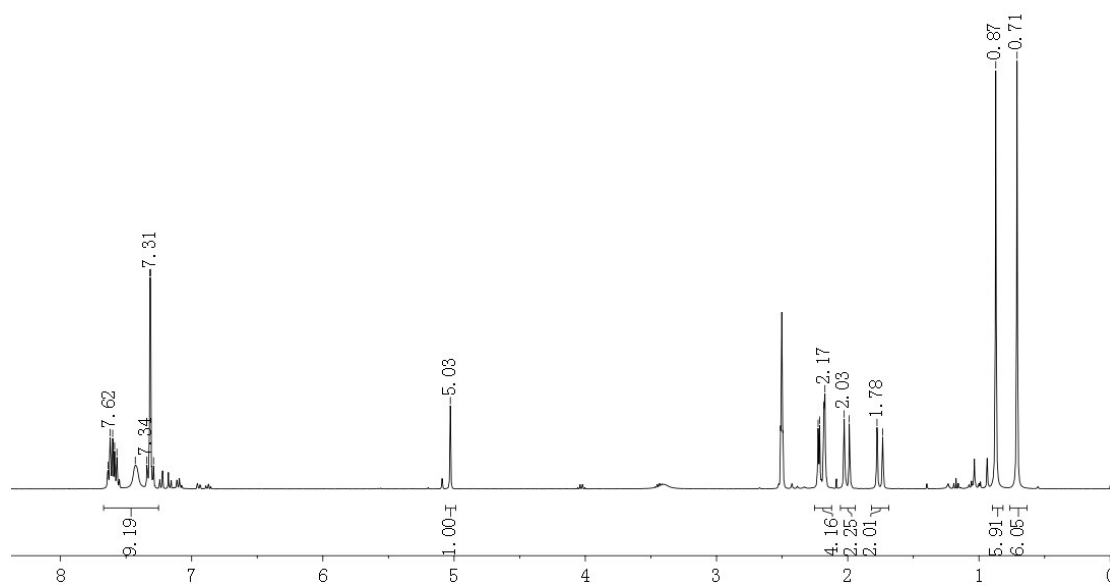

$^{13}\text{C NMR}$  (151 MHz, DMSO)  $\delta$  195.53, 150.99, 145.68, 138.80, 130.73, 129.94, 129.88, 128.36, 113.00, 49.94, 41.43, 32.43, 32.20, 31.17, 29.71, 26.58.

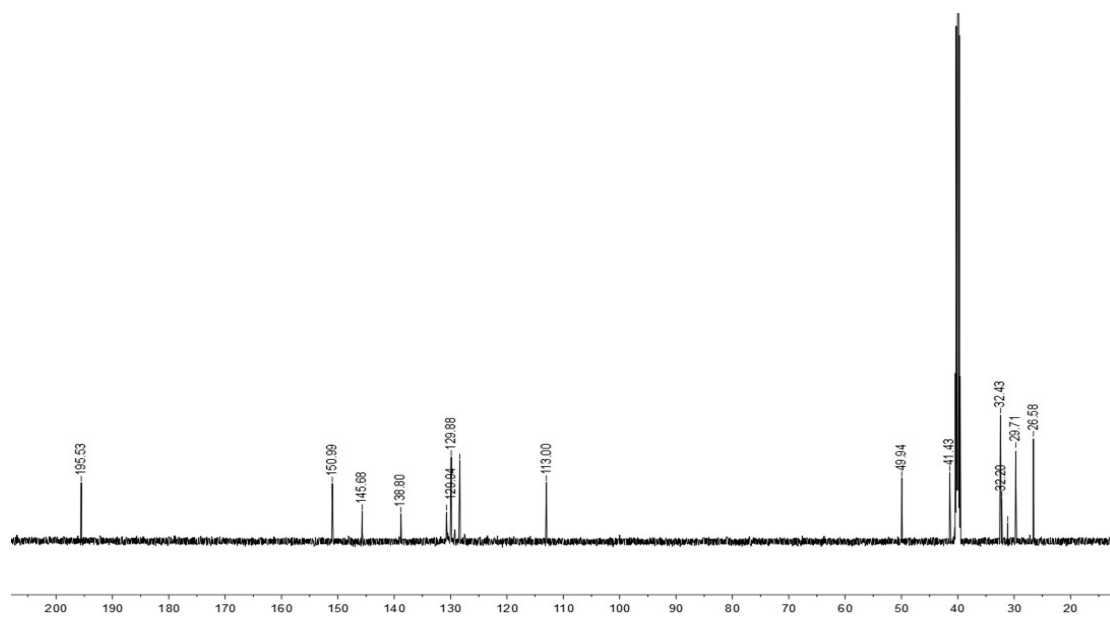

Supplement: c6ra25709g1.pdf [file c6ra25709g1.pdf]
